# Supplementary material for: The species translation challenge—A systems biology perspective on human and rat bronchial epithelial cells
Source: PubMed Central journal article supplement — Sci Data. 2014 Jun 10;1:140009. doi: 10.1038/sdata.2014.9 (PMC4322580; doi:10.1038/sdata.2014.9), 2014-06-10
Supplement: sdata20149-s2.pdf [file sdata20149-s2.pdf]

## Supplementary Information

|                                                                                                                                                                     |       |
|---------------------------------------------------------------------------------------------------------------------------------------------------------------------|-------|
| Supplementary Table 1. Results of proteomics data including phosphoproteomics and cytokine level measurements for NHBE and NRBE cells exposed to 52 stimuli .....   | 2     |
| Supplementary Figure 1. Quality assessment of proteomics data .....                                                                                                 | 3-5   |
| Supplementary Table 2. Results of phosphoprotein measurements in NHBE and NRBE using antibody-bead based assays for the experimental screening of 270 stimuli ..... | 6     |
| Supplementary Figure 2. Quality assessment of gene expression data .....                                                                                            | 7-9   |
| Supplementary Figure 3. Differential gene expression analysis of NHBE data .....                                                                                    | 10-13 |
| Supplementary Figure 4. Differential gene expression analysis of NRBE data .....                                                                                    | 14-17 |
| Supplementary Table 3. Catalogue numbers of antibody pairs used for multiplex bead assays .....                                                                     | 18    |
| Supplementary Table 4. Final selection of 52 stimuli used in the main experiment .....                                                                              | 19-25 |

*Note: the full legend description is located in the last page when several pages are necessary for a figure/table.*

Supplementary Table 1. Results of proteomics data including phosphoproteomics and cytokine level measurements for NHBE and NRBE cells exposed to 52 stimuli.

The file contains the median of bead fluorescence intensities measured for each protein in every sample (cell lysate and corresponding supernatant for phosphoproteins and cytokines, respectively). For each stimulus, sample replicates have been extracted from 3 independent wells. The results are reported for (a) 19 phosphoproteins, with in addition the measurements for 2 control beads (Control A: Phycoerythrin-coated beads used as positive control bead; Control B: BSA-coated beads devoid of antibody used as negative control bead), and for the actin; (b) 22 cytokines.

The data are accessible in Figshare: <http://dx.doi.org/10.6084/m9.figshare.960097>

A

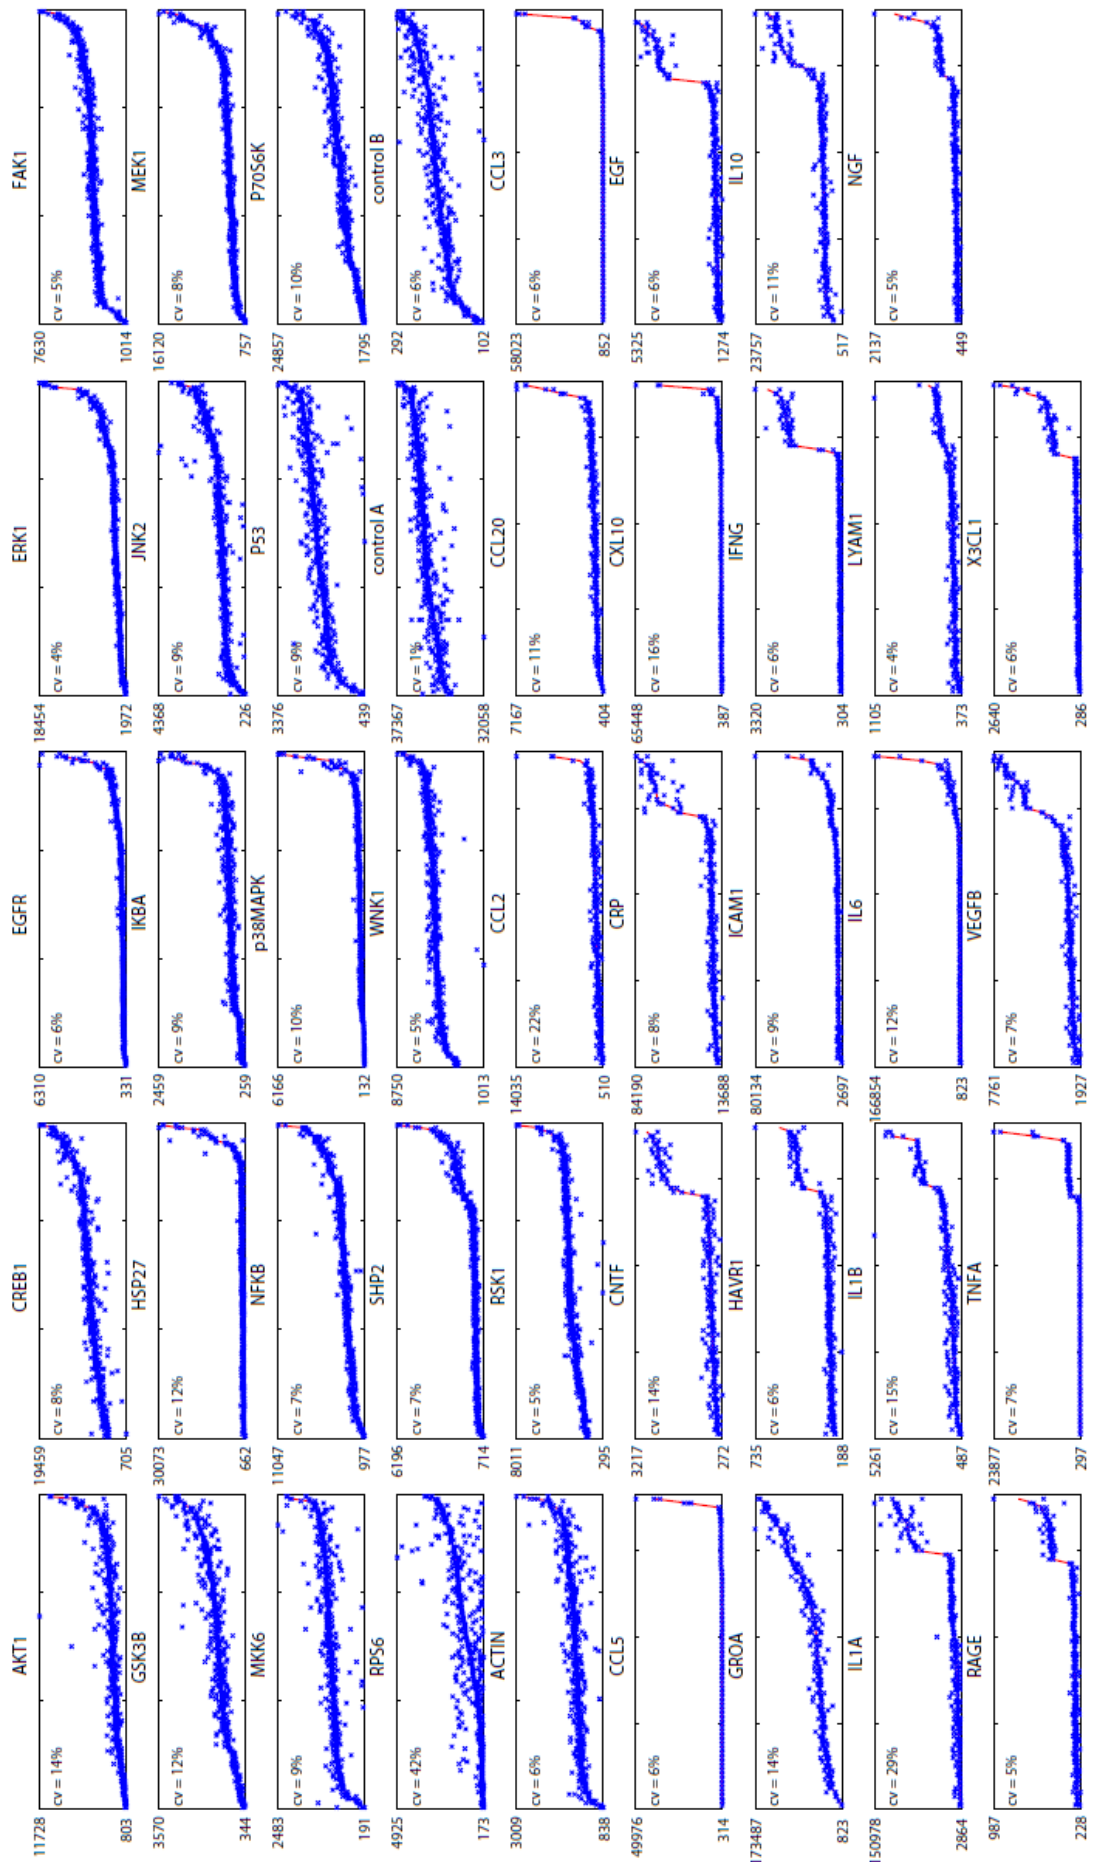

Supplementary Figure 1. Quality assessment of proteomics data (to be continued).

B

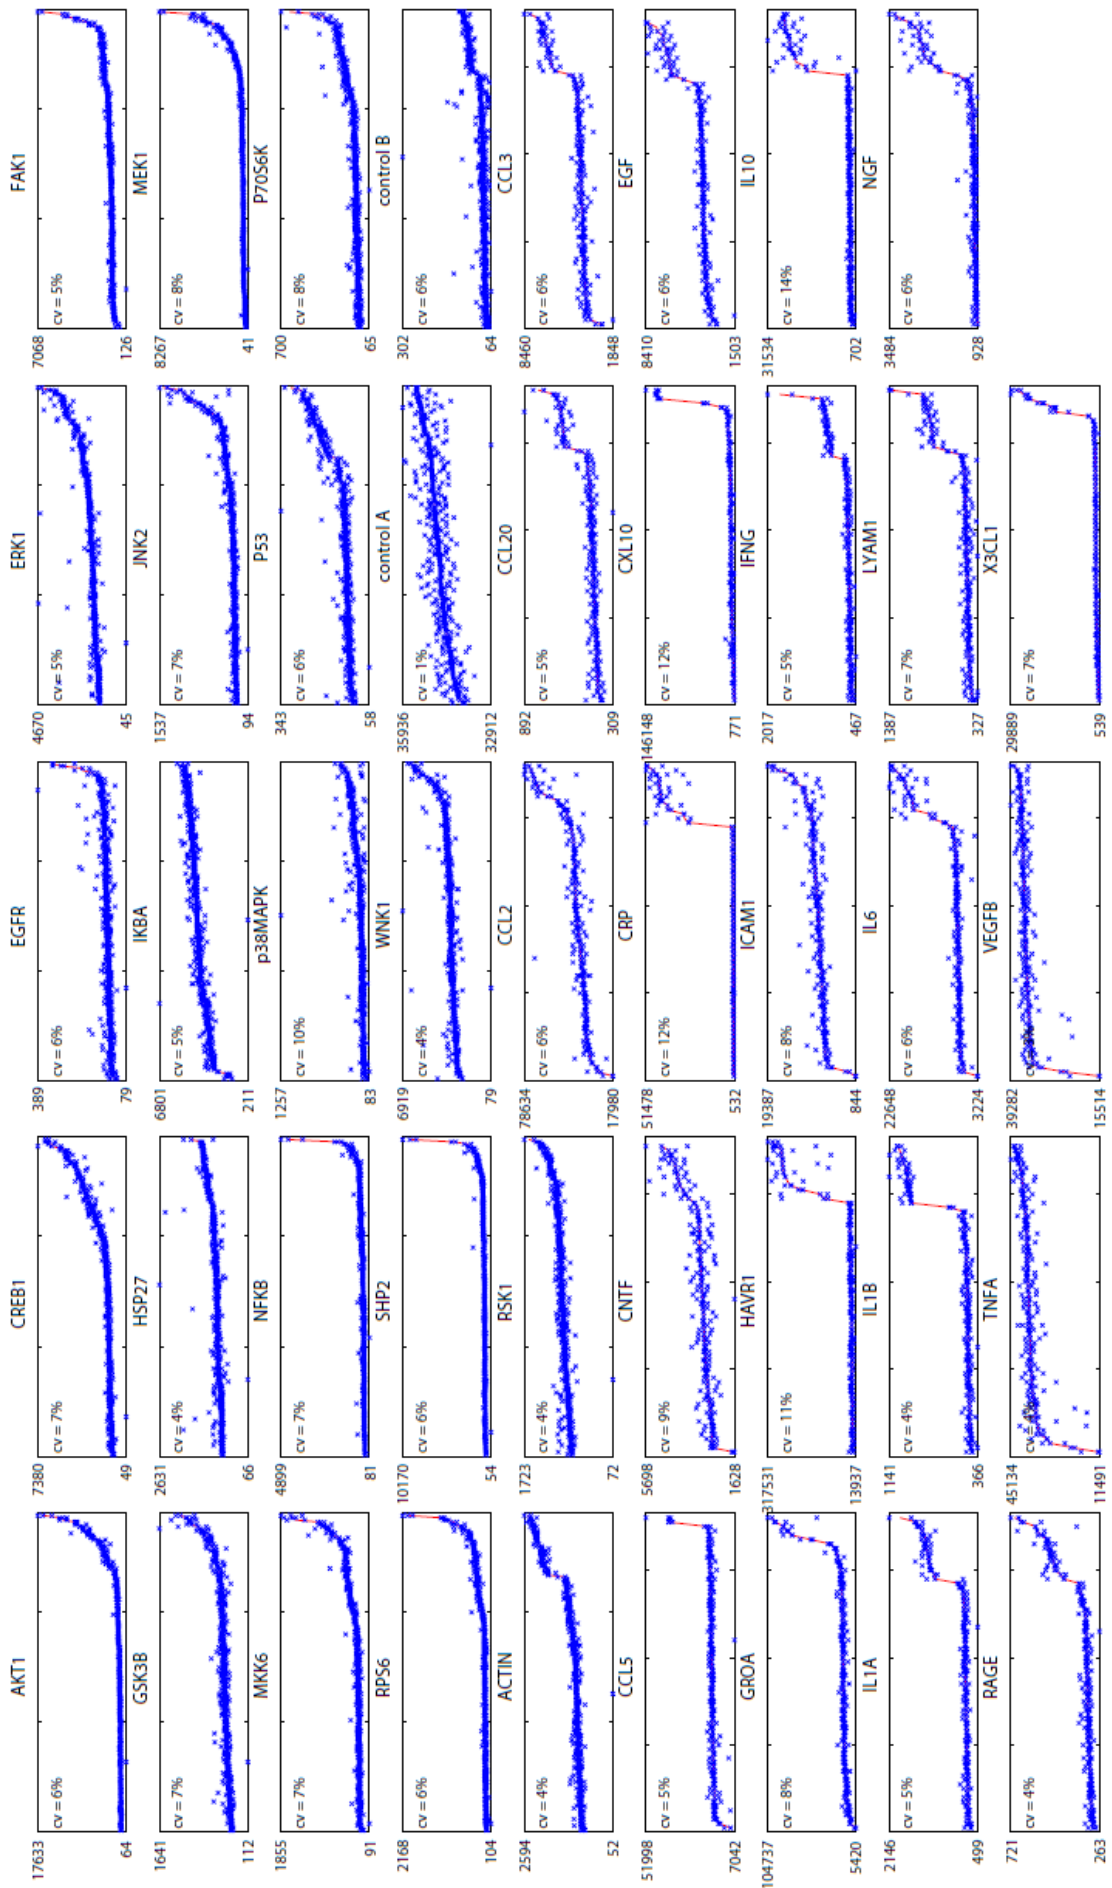

Supplementary Figure 1. Quality assessment of proteomics data (to be continued).

C

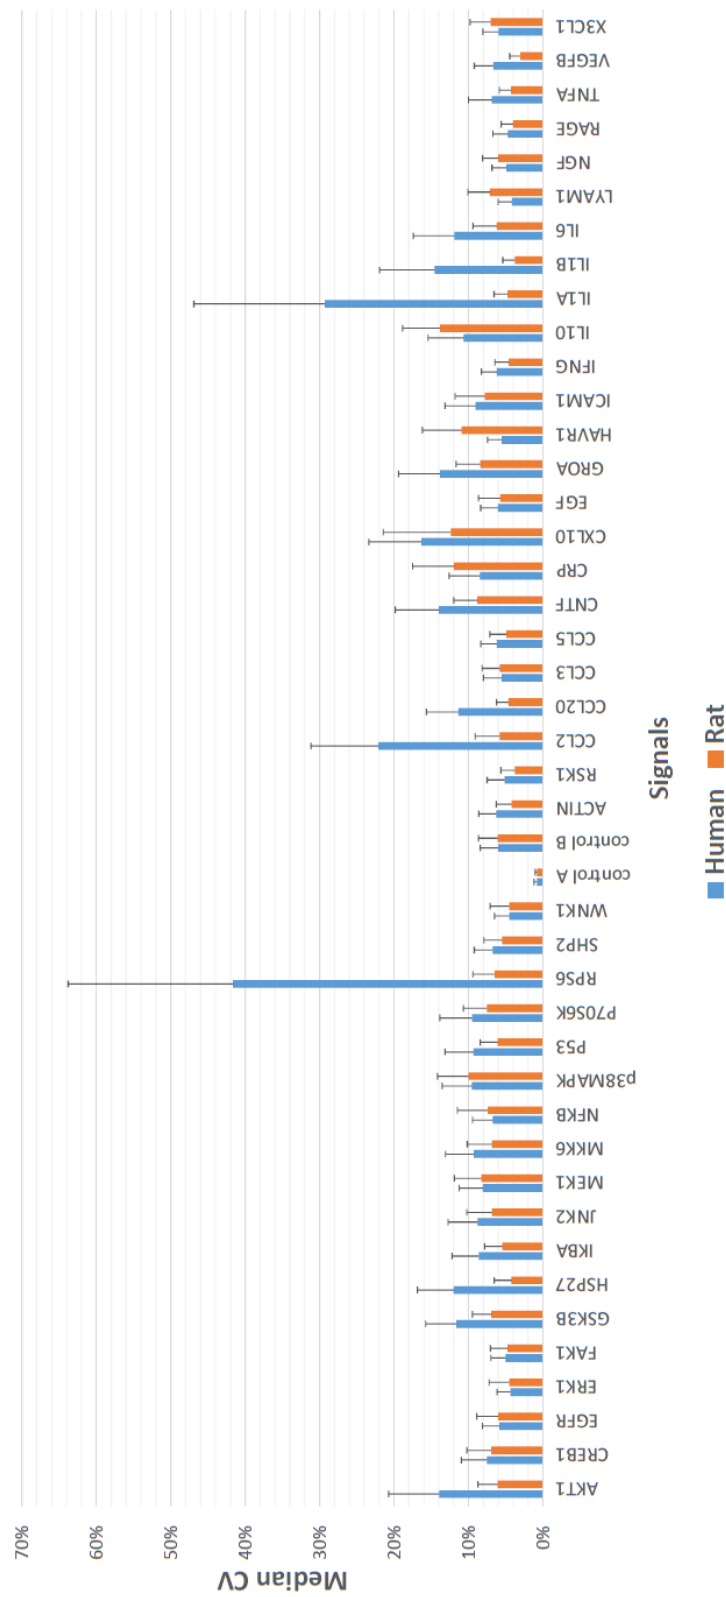

Supplementary Figure 1. Quality assessment of proteomics data.

Panel A and B: Raw data (fluorescent intensity) of each protein (indicated in the subplot title) for human (A) and rat (B) cells. On the x-axis data are sorted by raw median value of the triplicates across all conditions. For each protein (subplot) the y-axis ranges from minimum FI to maximum FI across all conditions. Each data point is represented by an 'x' lying above or below the red line that represents the median value of each set of replicates. The median of all the coefficients of variation of the replicate measurements is reported in the upper left corner of each plot. Panel C: Median CVs across all conditions for human (blue bars) and rat (orange bars) data together with the median absolute deviation from the median (MAD).

Supplementary Table 2. Results of phosphoprotein measurements in NHBE and NRBE using antibody-bead based assays for the experimental screening of 270 stimuli.

After an exposure of 5 minutes to each stimulus, cells were lysed and used to measure phosphoproteins. Data were analyzed and a final selection of 52 stimuli used for the main experiment was performed (Data deposited in the figshare public repository).

The data are accessible in Figshare: <http://dx.doi.org/10.6084/m9.figshare.960097>

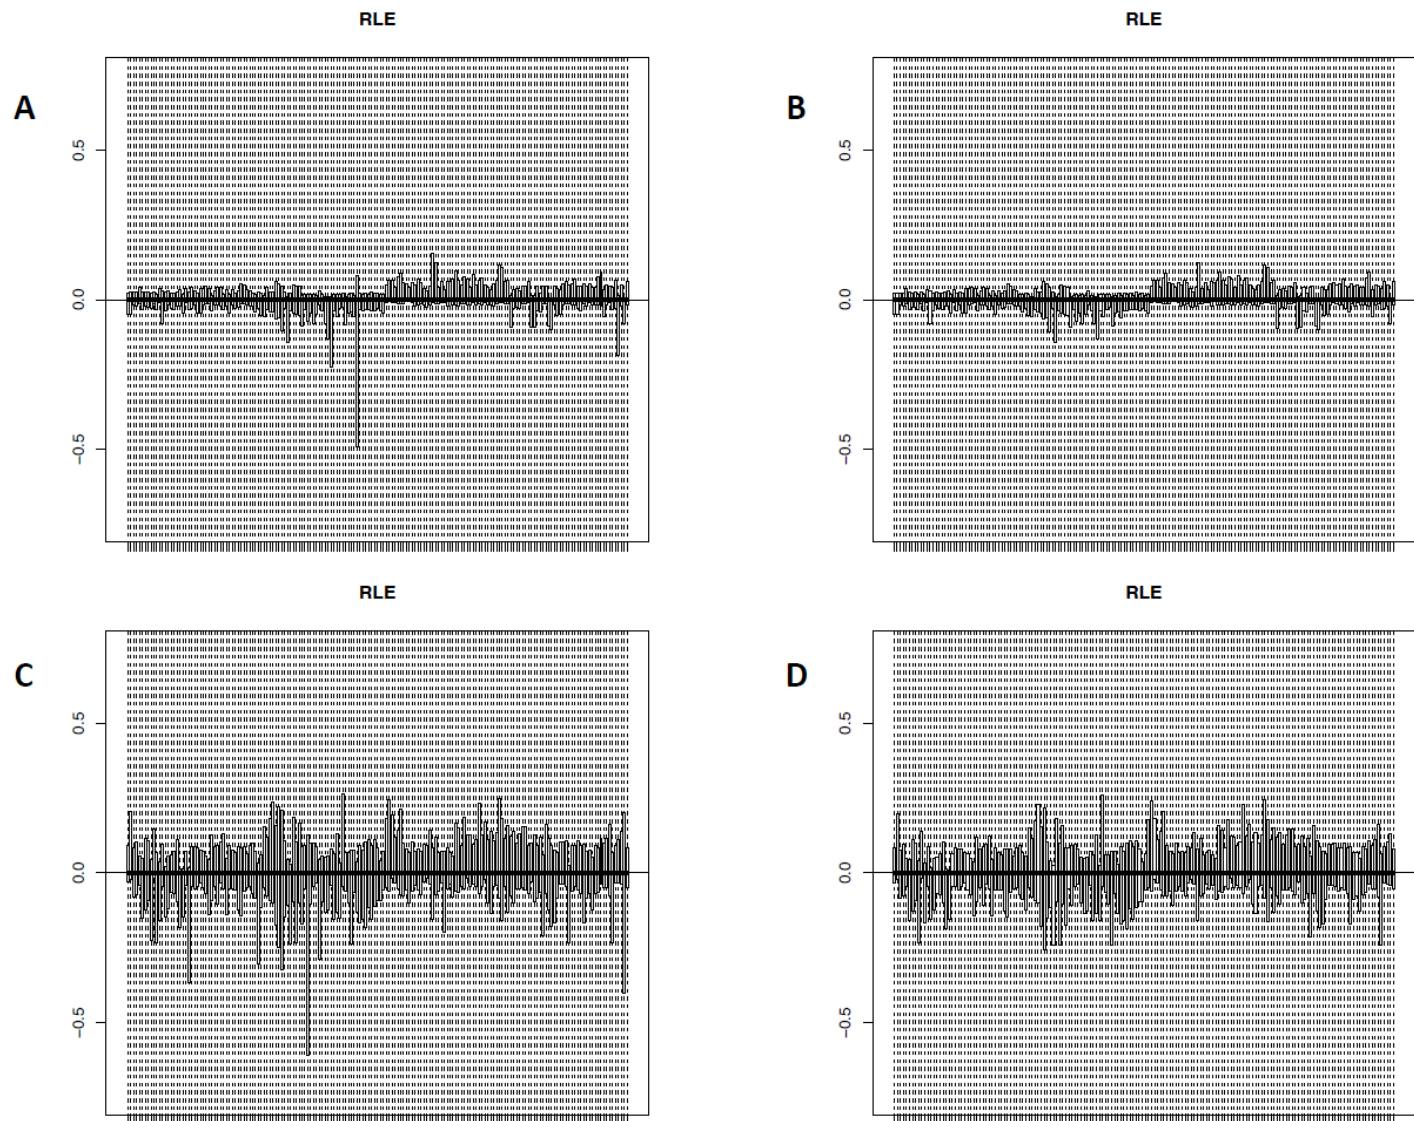

Supplementary Figure 2. Quality assessment of gene expression data (to be continued).

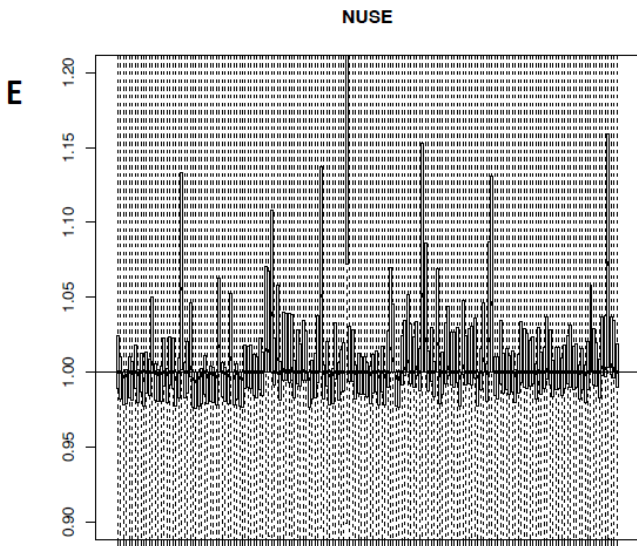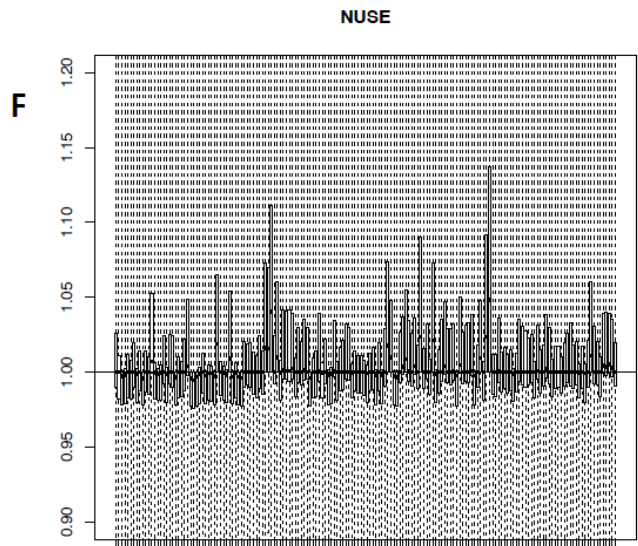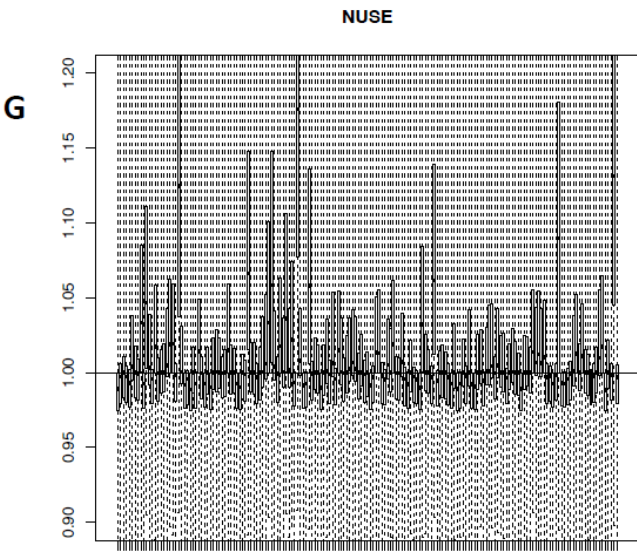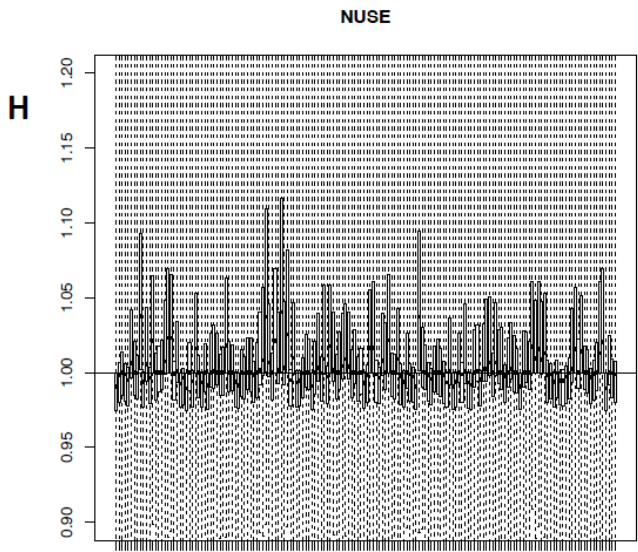

Supplementary Figure 2. Quality assessment of gene expression data (to be continued).



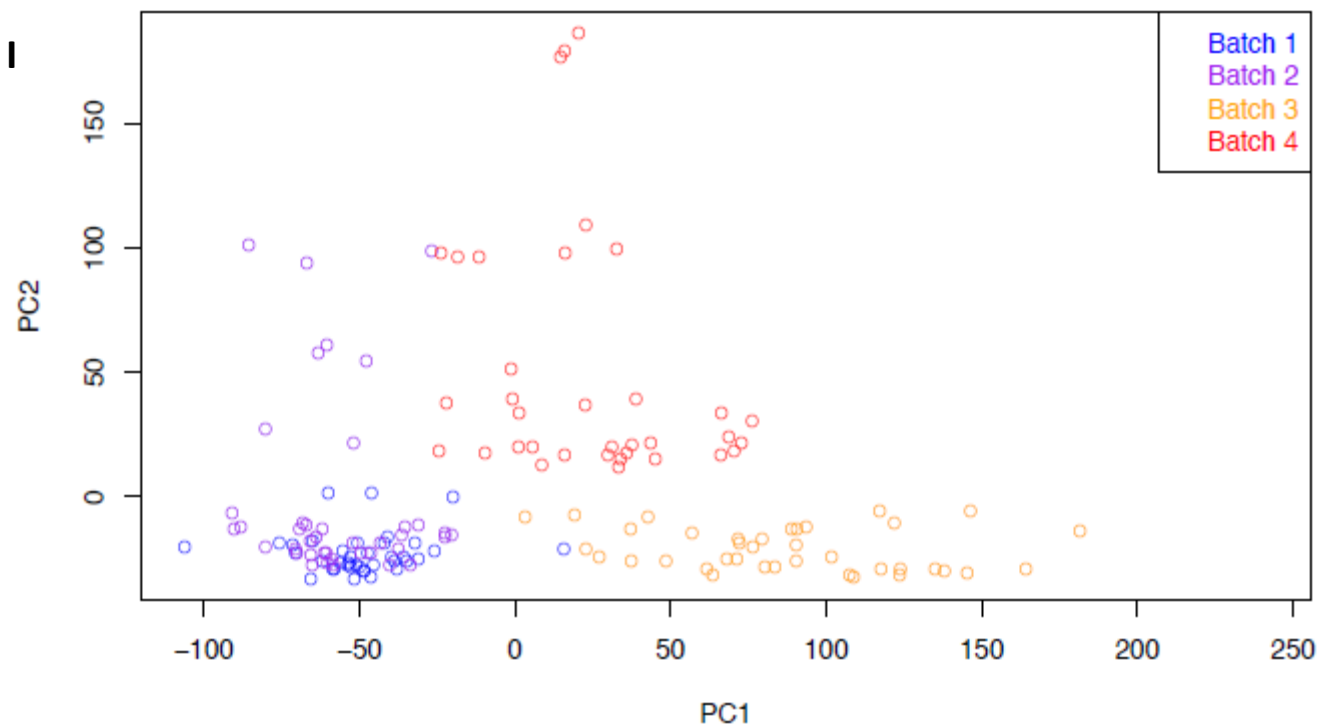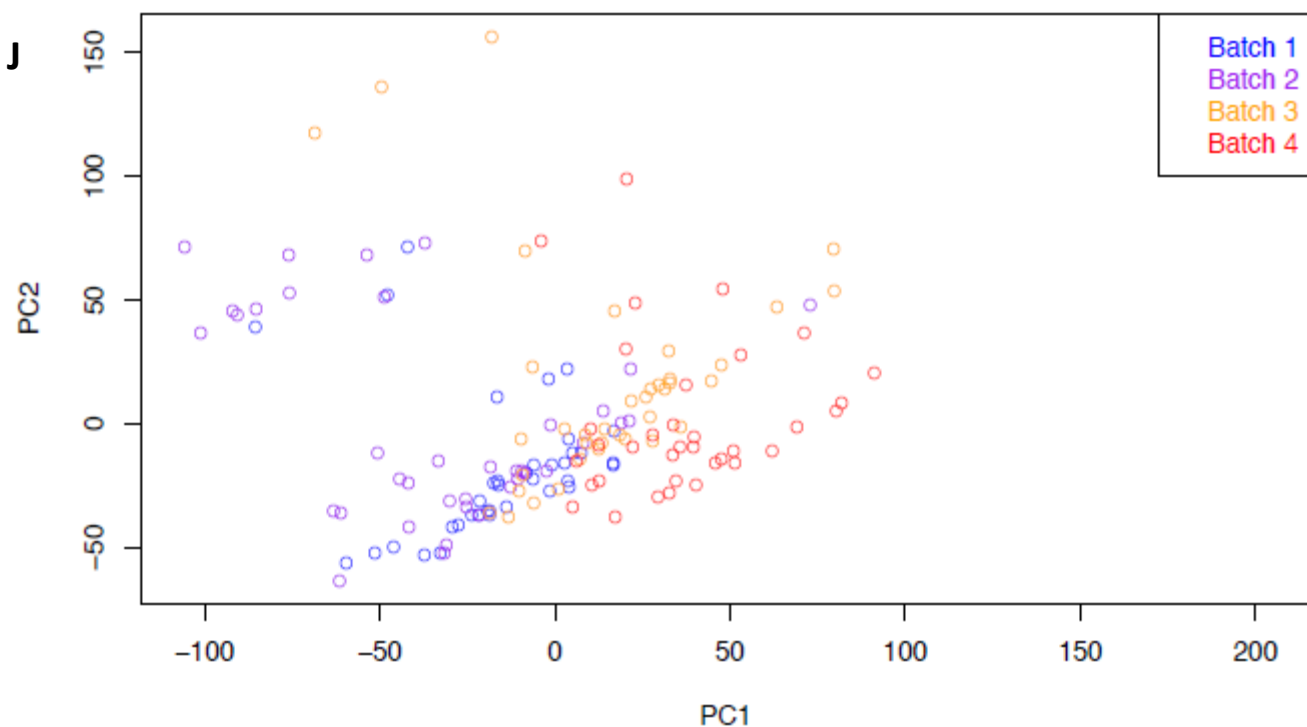

Supplementary Figure 2. Quality assessment of gene expression data.

Relative log expression (RLE, A and B for human, C and D for rat) and normalized unscaled standard error (NUSE, E and F for human, G and H for rat) boxplots were generated before (A, C, E, G) and after (B, D, F, H) the exclusion of low quality chips. When CEL files were excluded, the remaining data were re-processed together using GCRMA. Principal component analysis of centered and non-scaled GCRMA-normalized human and rat gene expression data was conducted. Individual samples are colored by their respective batch. (I) The first two principal components for human gene expression data each explain 29.5% and 15.0% of the total variance. (J) The first two principal components for rat gene expression data each explain 17.1% and 13.8% of the total variance.

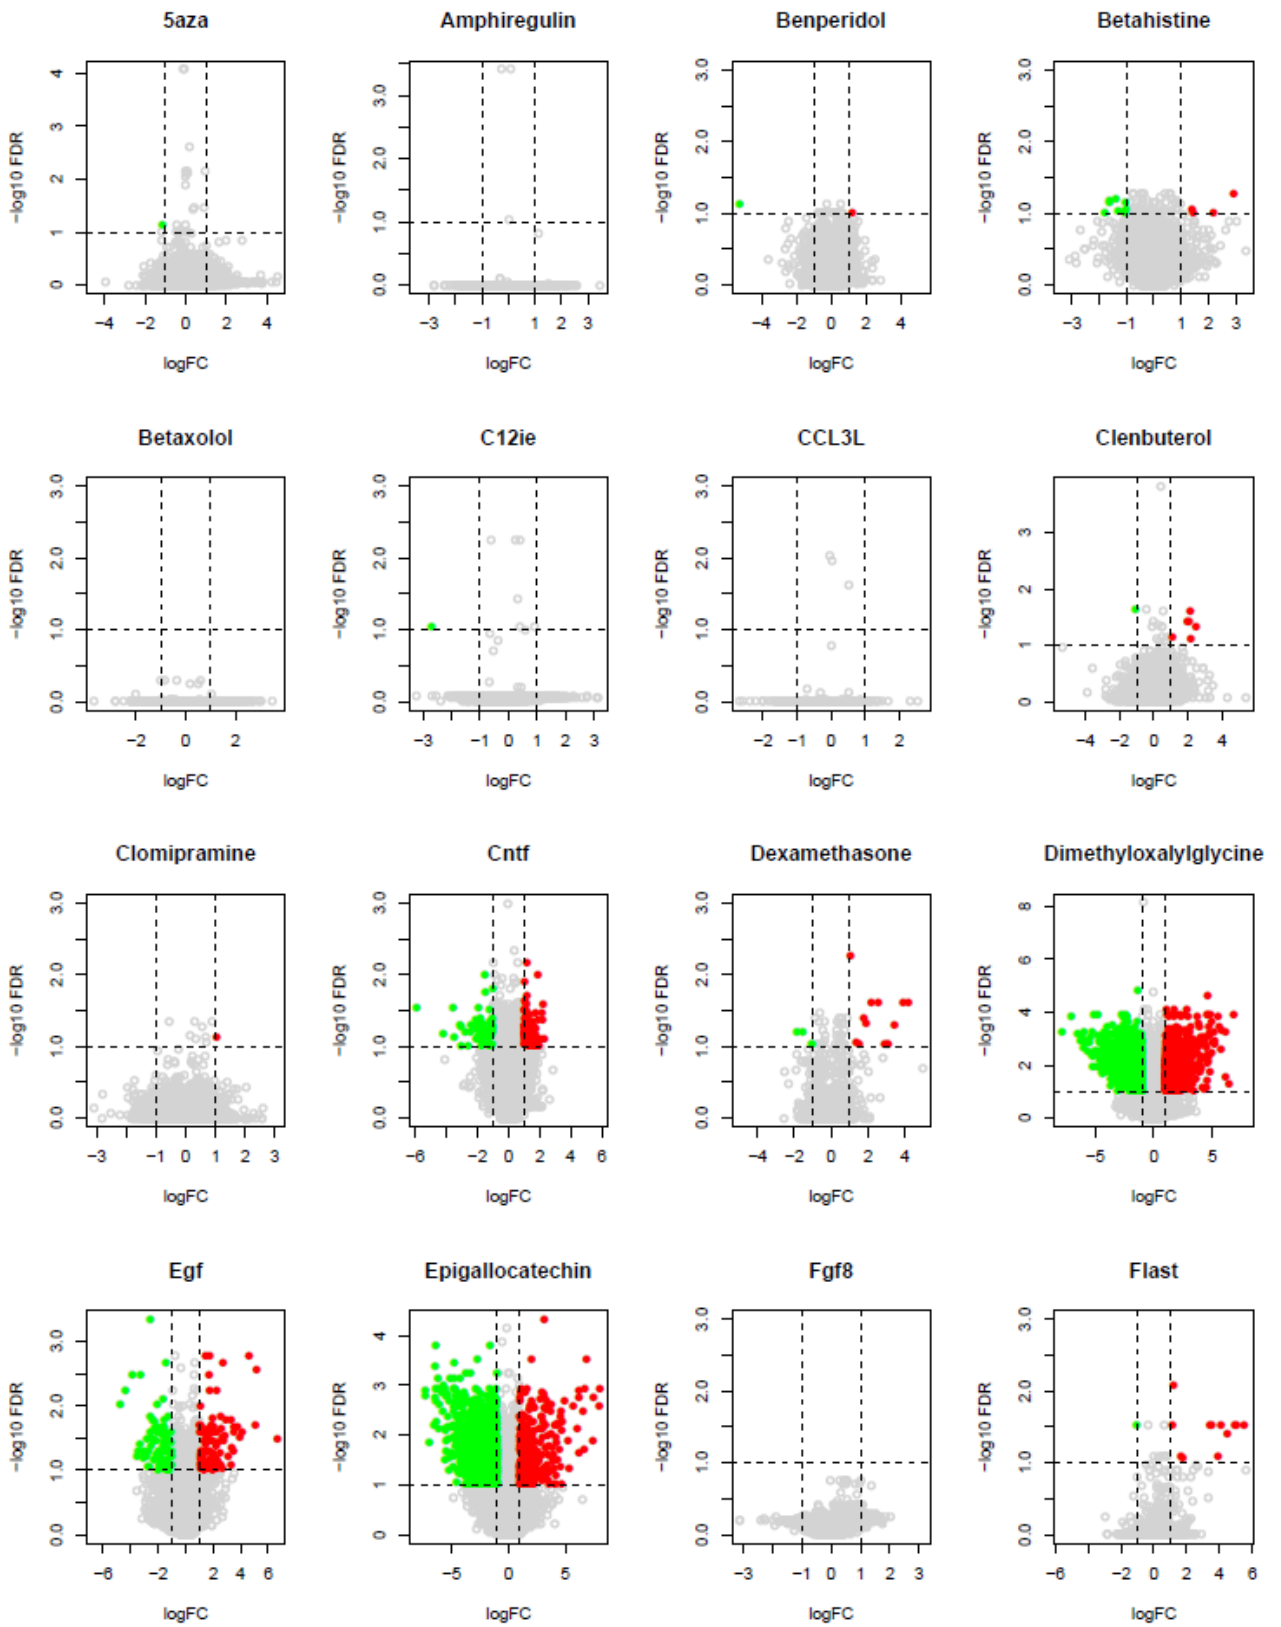

Supplementary Figure 3. Differential gene expression analysis of NHBE data (to be continued).

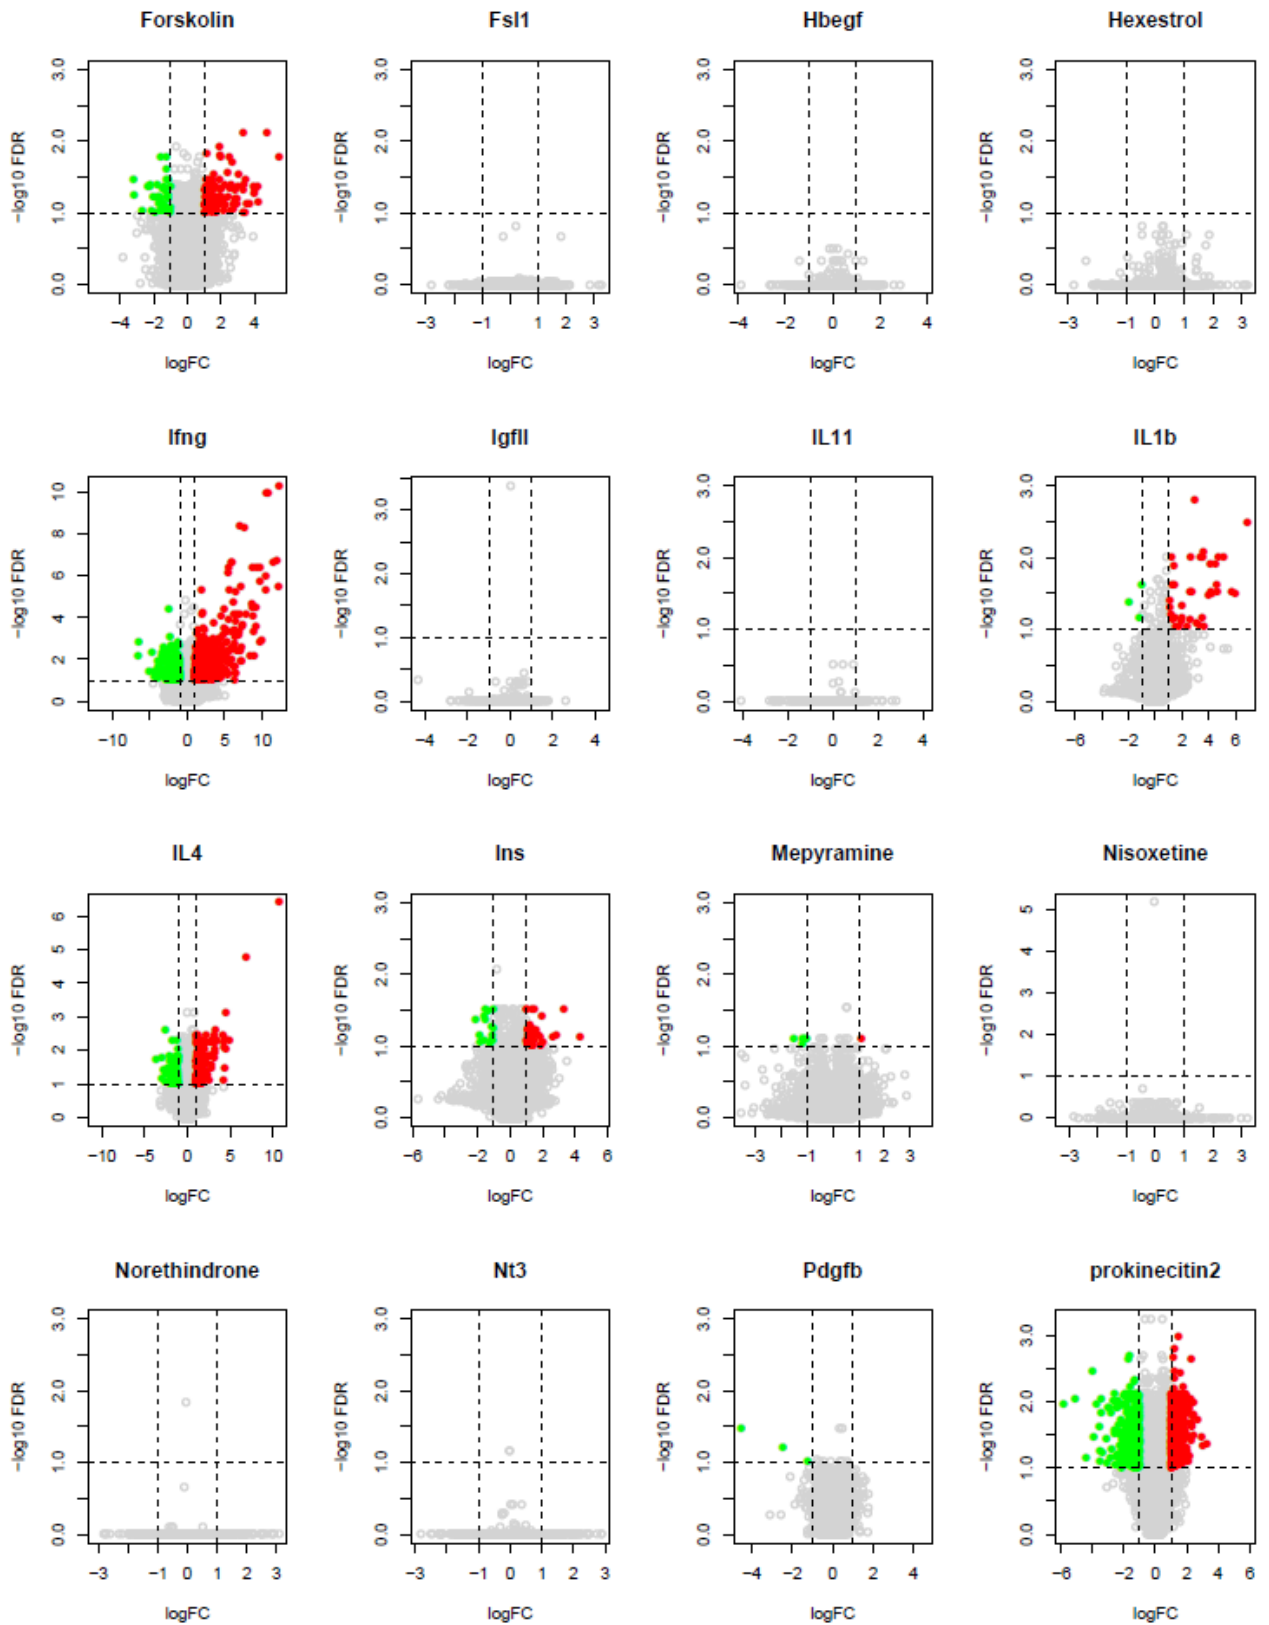

Supplementary Figure 3. Differential gene expression analysis of NHBE data (to be continued).

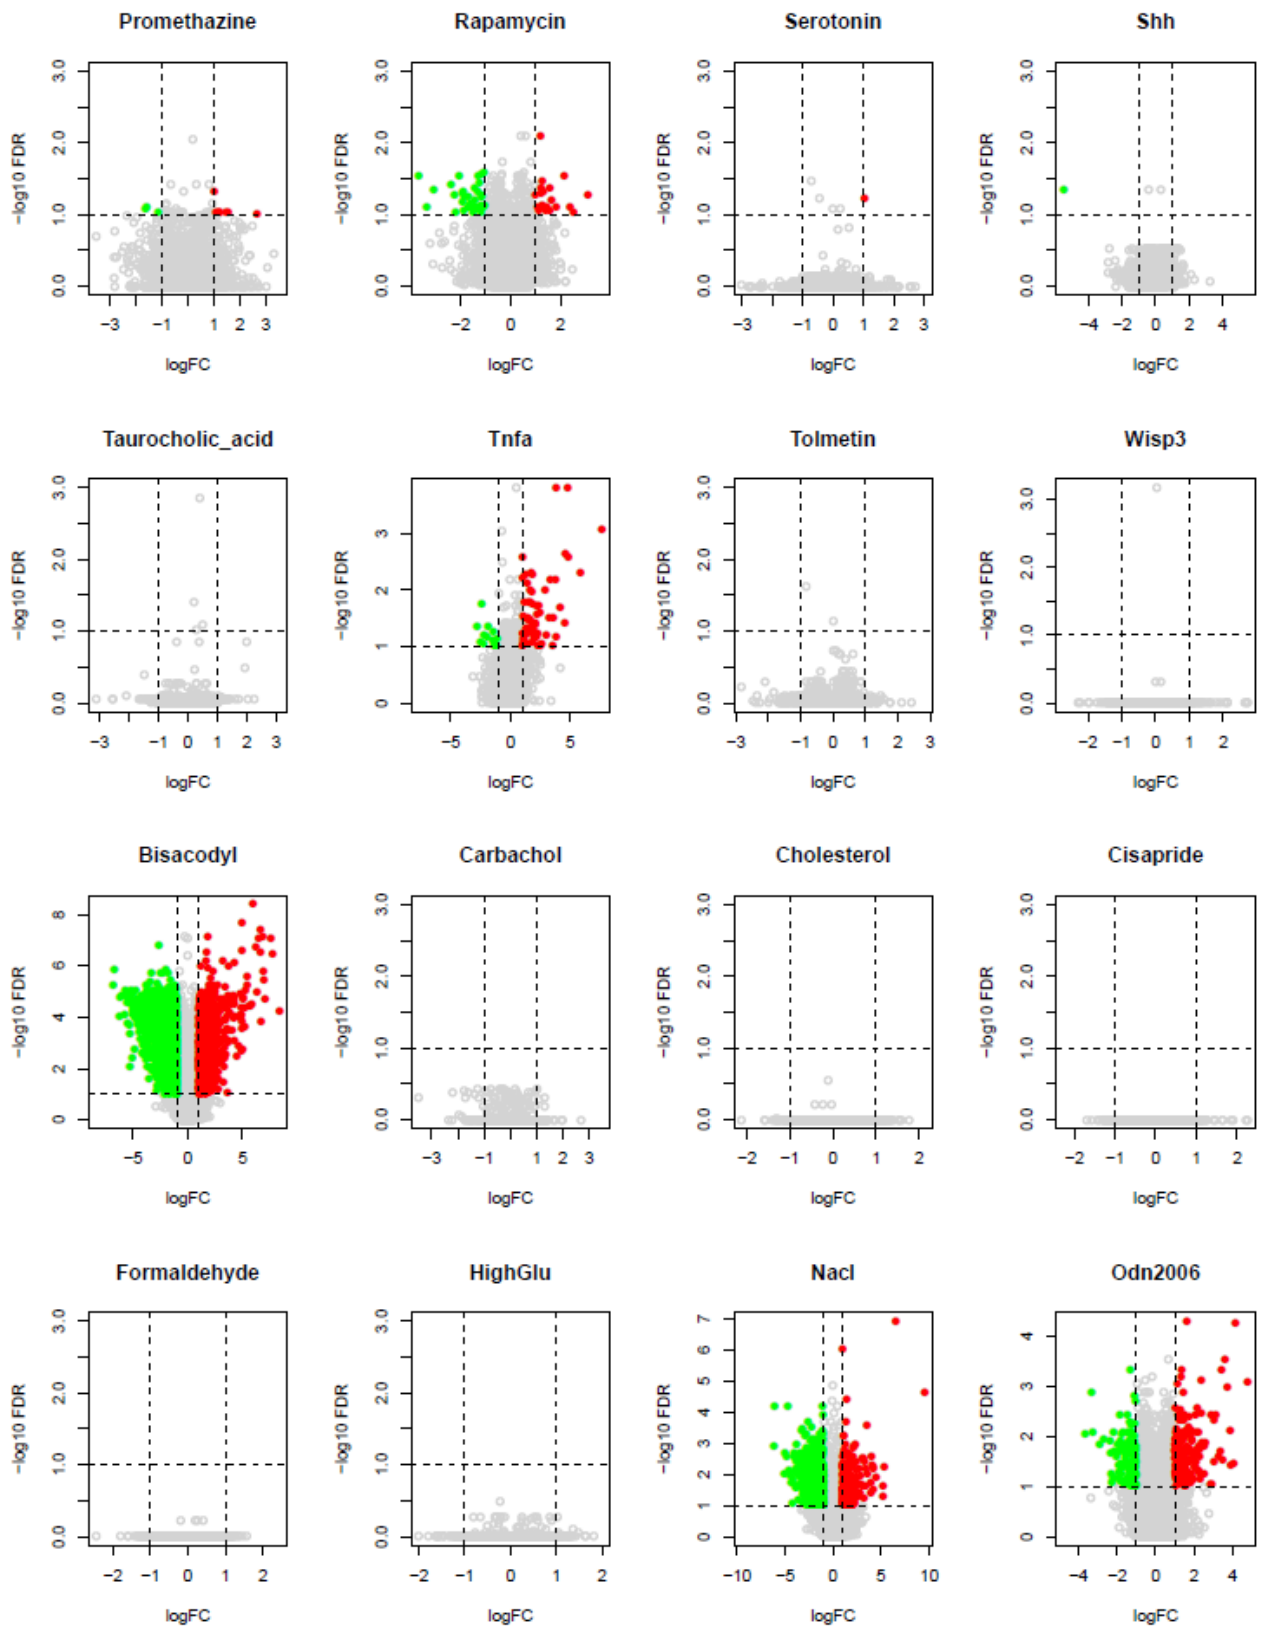

Supplementary Figure 3. Differential gene expression analysis of NHBE data (to be continued).

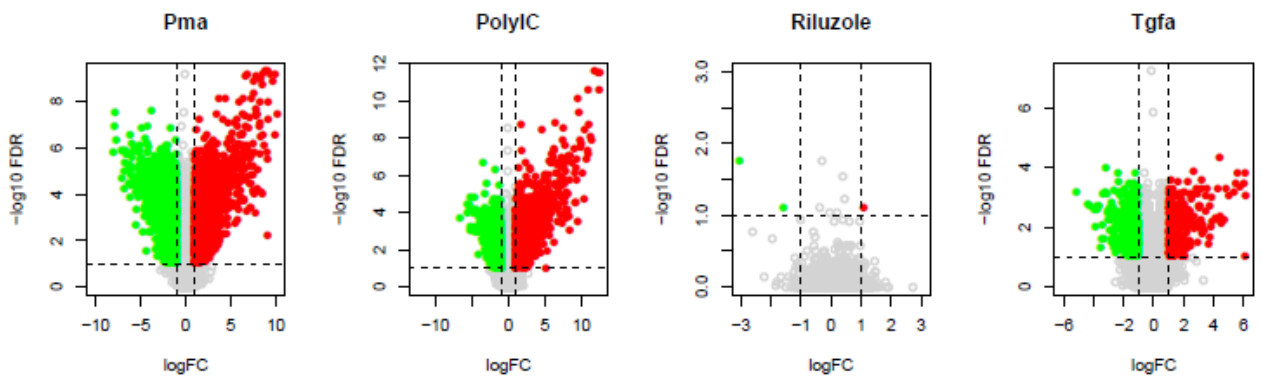

Supplementary Figure 3. Differential gene expression analysis of NHBE data.

Each subplot represents a volcano plot for each stimulus. The x-axis represents the differential expression between DME control vs individual stimulus treatment expressed as log base 2 fold change ( $\log_{2} \text{FC}$ ). The y-axis represents the significance level of the differential expression expressed as  $-\log_{10}$  false discovery rate ( $-\log_{10} \text{FDR}$ ). The vertical dotted lines illustrate differential expression of -1 and +1 as  $\log_{2} \text{FC}$ , and the horizontal line represents a FDR threshold of 0.1. Dots beyond these lines are colored in green (down-regulation) or in red (up-regulation), and represent genes that have associated  $\log_{2} \text{FC}$  and FDR values beyond these dotted lines.

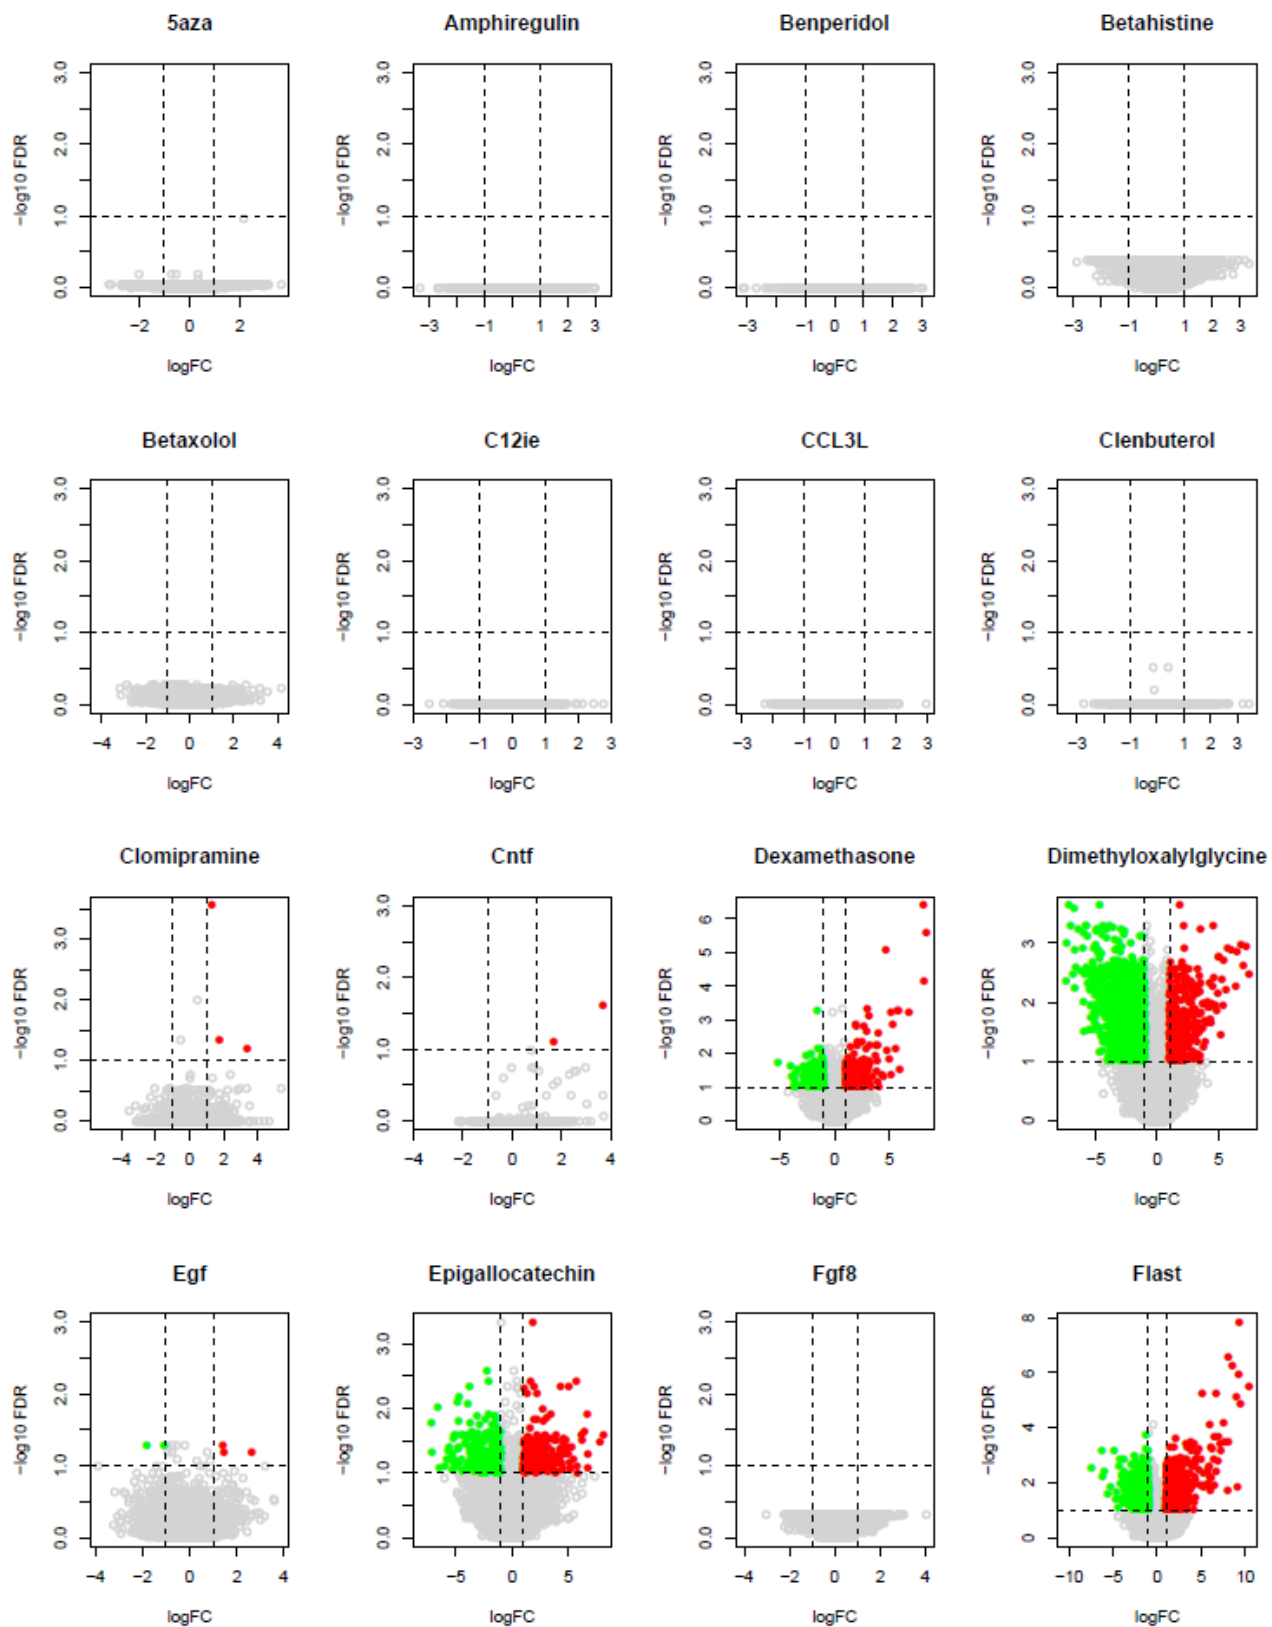

Supplementary Figure 4. Differential gene expression analysis of NRBE data (to be continued).

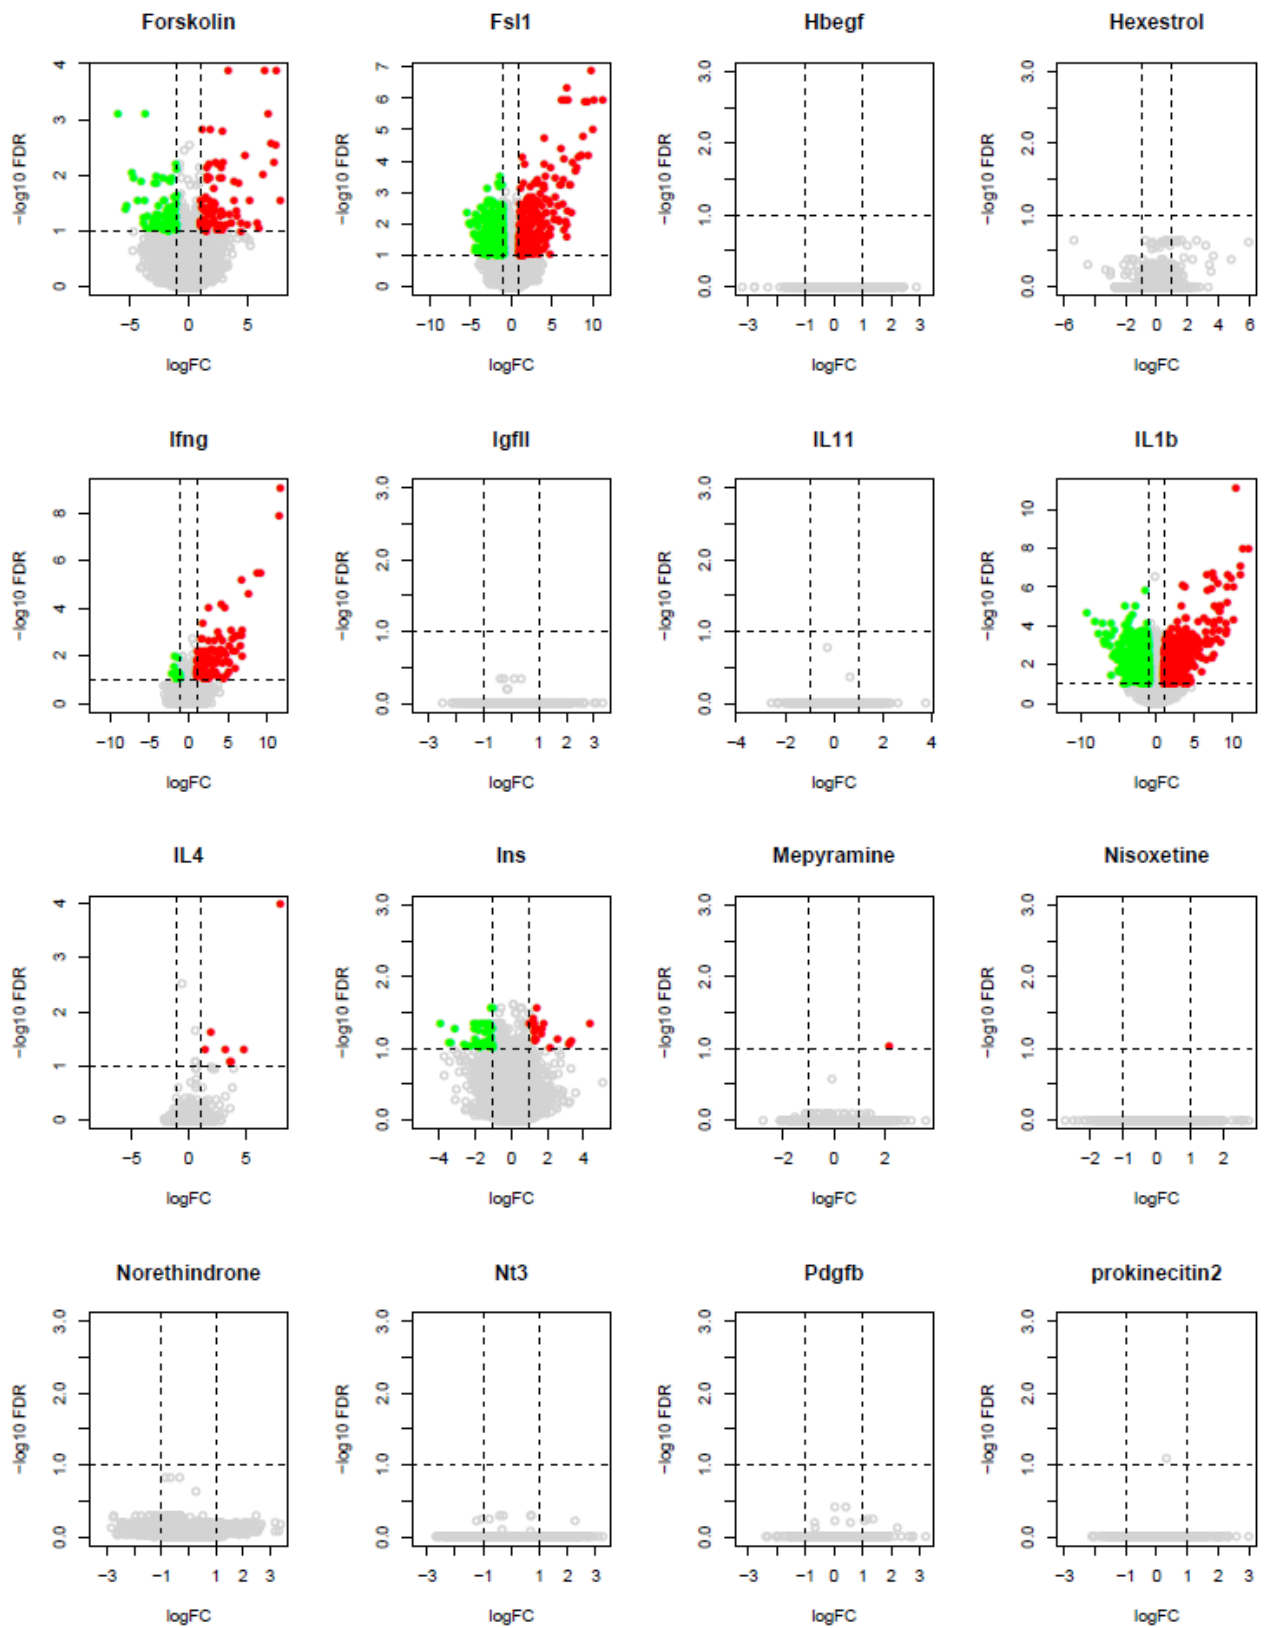

Supplementary Figure 4. Differential gene expression analysis of NRBE data (to be continued).

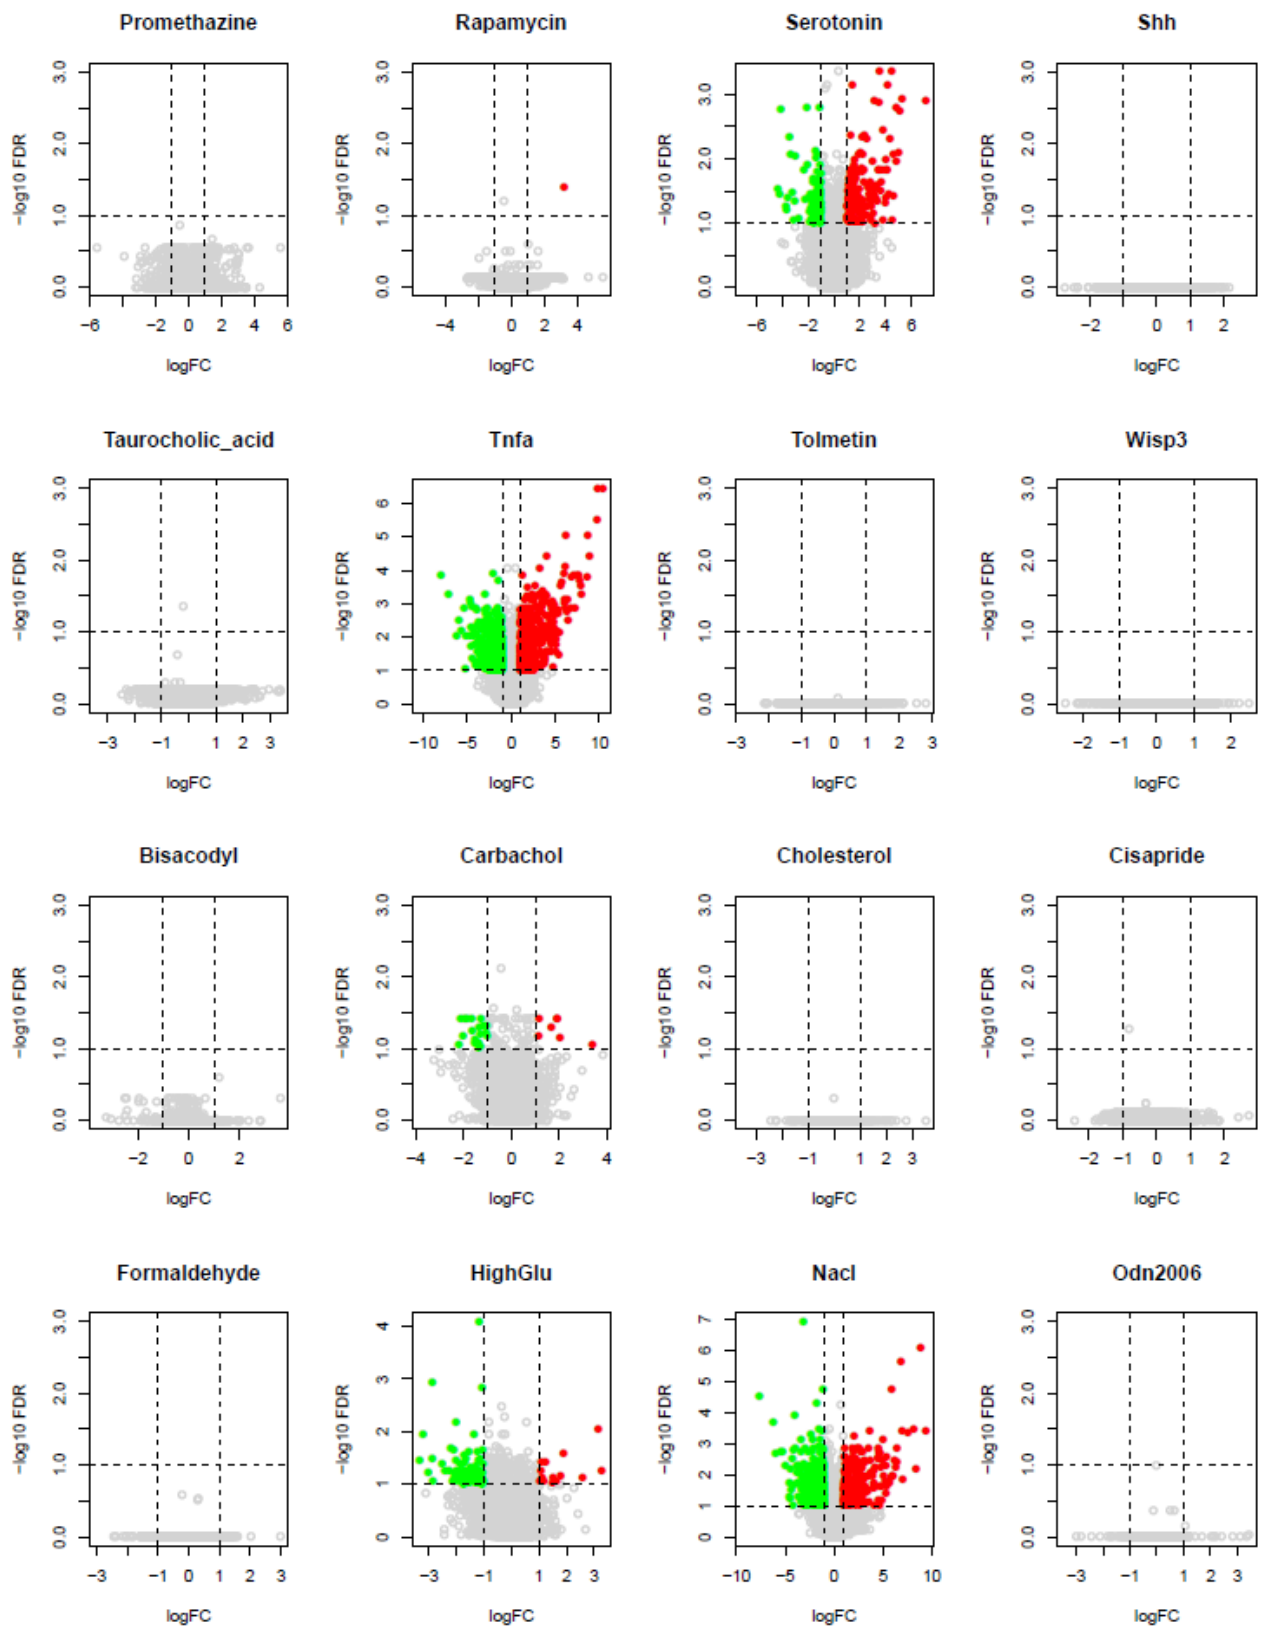

Supplementary Figure 4. Differential gene expression analysis of NRBE data (to be continued).



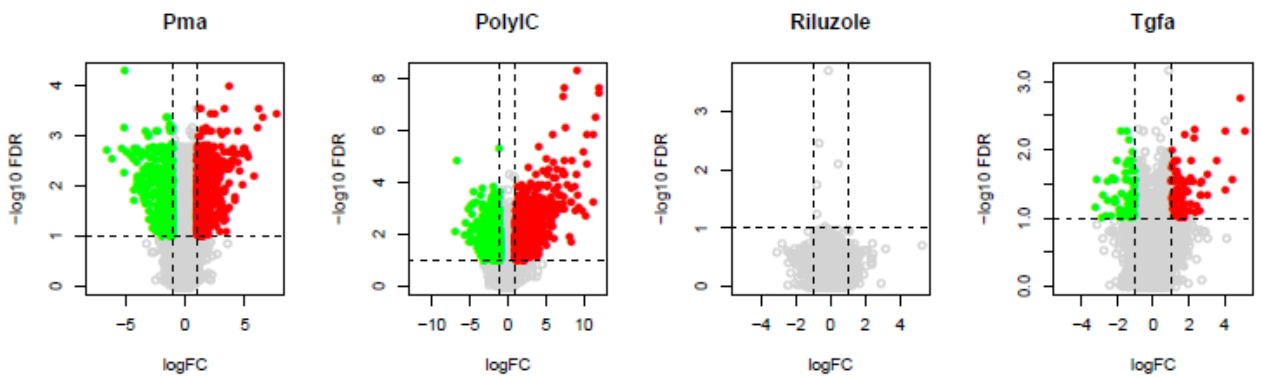

Supplementary Figure 4. Differential gene expression analysis of NRBE data.

Each subplot represents a volcano plot for each stimulus. The x-axis represents the differential expression between DME control vs individual stimulus treatment expressed as log base 2 fold change ( $\log_{2} \text{FC}$ ). The y-axis represents the significance level of the differential expression expressed as  $-\log_{10}$  false discovery rate ( $-\log_{10} \text{FDR}$ ). The vertical dotted lines illustrate differential expression of -1 and +1 as  $\log_{2} \text{FC}$ , and the horizontal line represents a FDR threshold of 0.1. Dots beyond these lines are colored in green (down-regulation) or in red (up-regulation), and represent genes that have associated  $\log_{2} \text{FC}$  and FDR values beyond these dotted lines.

|                        | PROTEIN NAME                       | HUMAN PLEX                | RAT PLEX             |
|------------------------|------------------------------------|---------------------------|----------------------|
| <b>PHOSPHOPROTEINS</b> | AKT1                               | BioRad: 171-V50001M       | PRT: P-AKT1-A01      |
|                        | CREB1                              | PRT: P-CREB1-A01          | PRT: P-CREB1-A01     |
|                        | EGFR                               | PRT: P-EGFR-A01           | PRT: P-EGFR-A01      |
|                        | ERK1                               | PRT: P-MK03-A01           | PRT: P-MK03-A01      |
|                        | FAK1                               | RnD: DYC4528              | RnD: DYC4528         |
|                        | GSK3B                              | BioRad: 171-V50007M       | RnD: DYC1590         |
|                        | HSP27                              | PRT: P-HSPB1-A01          | PRT: P-HSPB1-A01     |
|                        | IKBA                               | PRT: P-IKBA-A01           | PRT: P-IKBA-A01      |
|                        | JNK2                               | RnD: DYC2236              | RnD: DYC2236         |
|                        | MEK1                               | PRT: P-MP2K1-A01          | PRT: P-MP2K1-A01     |
|                        | MKK6                               | RnD: DYC5586              | RnD: DYC5586         |
|                        | NFKB                               | PRT: P-NFKB-A01           | PRT: P-NFKB-A01      |
|                        | p38MAPK                            | BioRad: 171-V50014M       | PRT: P-MK1234-A01    |
|                        | P53                                | PRT: P-P53-A01            | PRT: P-P53-A01       |
|                        | P70S6K                             | BioRad: 171-V50015M       | RnD: DYC8965, DYC896 |
|                        | RPS6                               | RnD: DYC3918              | RnD: DYC3918         |
|                        | SHP2                               | RnD: DYC3790              | RnD: DYC3790         |
|                        | WNK1                               | RnD: DYC4720              | RnD: DYC4720         |
|                        | RSK1                               | RnD: DYC892               | RnD: DYC892          |
|                        | control A                          | PRT (custom order)        | PRT (custom order)   |
| control B              | PRT (custom order)                 | PRT (custom order)        |                      |
| ACTIN                  | CST: 4970 and 5057                 | CST: 4970 and 5057        |                      |
| <b>CYTOKINES</b>       | CCL2                               | PRT: CH-CCL2-A02          | PRT: CR-CCL2-A02     |
|                        | CCL20                              | RnD: DY360                | RnD: DY540           |
|                        | CCL3                               | PRT: CH-CCL3-A02          | PRT: CR-CCL3-A02     |
|                        | CCL5                               | PRT: CH-CCL5-A02          | PRT: CR-CCL5-A02     |
|                        | CNTF                               | PRT: CH-CNTF-A02          | PRT: CR-CNTF-A02     |
|                        | CRP                                | RnD: DY1707               | RnD: DY1744          |
|                        | CXL10                              | PRT: CH-CXL10-A02         | PRT: CR-CXL10-A02    |
|                        | EGF                                | PRT: CH-EGF-A02           | PRT: CR-EGF-A02      |
|                        | GROA                               | PRT: CH-GROA-A02          | PRT: CR-GROA-A02     |
|                        | HAVR1                              | RnD: DY1750               | RnD: DY3689          |
|                        | ICAM1                              | PRT: CH-ICAM1-A02         | RnD: DY583           |
|                        | IFNG                               | PRT: CH-IFNG-A02          | PRT: CR-IFNG-A02     |
|                        | IL10                               | PRT: CH-IL10-A02          | RnD: DY522           |
|                        | IL1A                               | PRT: CH-IL1A-A02          | PRT: CR-IL1A-A02     |
|                        | IL1B                               | RnD: DY201                | RnD: DY201           |
|                        | IL6                                | PRT: CH-IL6-A02           | PRT: CR-IL6-A02      |
|                        | LYAM1                              | RnD: DY728                | RnD: DY1534          |
|                        | NGAL                               | N/A                       | RnD: DY3508          |
|                        | NGF                                | RnD: DY556                | RnD: DY556           |
|                        | RAGE                               | RnD: DY1616               | RnD: DY1616          |
| TNFA                   | PRT: CH-TNFA-A02                   | PRT: CR-TNFA-A02          |                      |
| VEGFB                  | PRT: CH-VEGFB-A02                  | PRT: CR-VEGFB-A02         |                      |
| X3CL1                  | RnD: DY537                         | RnD: DY537                |                      |
|                        | Coupling Kit                       | Luminex: Cat#40-50016     |                      |
|                        | Phosphoprotein preparation buffers | ProtATonce: Cat#PPK40-A01 |                      |
|                        | Cytokine preparation assay buffers | ProtATonce: Cat#CTP40-A01 |                      |
|                        | Multiplex measurement service      | ProtATonce: Custom order  |                      |

Supplementary Table 3. Catalogue numbers of antibody pairs used for multiplex bead assays.

RnD: RnD Systems, <http://www.rndsystems.com/>; CST: Cell Signaling Technology, <http://www.cellsignal.com/>; BioRad: Bio-Rad Laboratories, <http://www.bio-rad.com/>; PRT: ProtATonce ltd, <http://www.protATonce.com>

| LEGEND | Supplier    | compound name from UniProt, PubChem or other source | compound ID from UniProt or PubChem | compound IMAGE from PubChem, PDB or other source                                    | target concentration we used in ng/ml |             |                |               | Compound Function, Pharmacological Action or general Biological Effect. Sources: UniProt, PubChem, MeSH, other                                                      |
|--------|-------------|-----------------------------------------------------|-------------------------------------|-------------------------------------------------------------------------------------|---------------------------------------|-------------|----------------|---------------|---------------------------------------------------------------------------------------------------------------------------------------------------------------------|
|        | Catalog #   |                                                     |                                     |                                                                                     | active IC50s                          | total IC50s | active screens | total screens |                                                                                                                                                                     |
|        | CAS #       |                                                     |                                     |                                                                                     | Supplier's name for compound          |             |                |               |                                                                                                                                                                     |
| 1      | SantaCruz   | decitabine                                          | 451668                              | 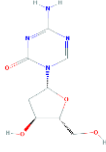   | 1141                                  |             |                |               | Antimetabolites/Antineoplastic, Enzyme Inhibitors, Teratogens, Methyltransferase Inhibitor                                                                          |
|        | sc-202424   |                                                     |                                     |                                                                                     | 6                                     | 17          | 6              | 308           |                                                                                                                                                                     |
|        | 2353-33-5   |                                                     |                                     |                                                                                     | 5-Aza-2'-Deoxycytidine                |             |                |               |                                                                                                                                                                     |
| 2      | Prestwick   | benperidol                                          | 16363                               |    | 100                                   |             |                |               | Antipsychotic Agents, Dopamine Antagonists                                                                                                                          |
|        | Prestw-484  |                                                     |                                     |                                                                                     | 0                                     | 12          | 4              | 289           |                                                                                                                                                                     |
|        | 2062-84-2   |                                                     |                                     |                                                                                     | Benperidol                            |             |                |               |                                                                                                                                                                     |
| 3      | PeproTech   | AREG (amphiregulin)                                 | P15514                              |    | 3967                                  |             |                |               | Ligand of the EGF receptor/EGFR. Autocrine growth factor as well as a mitogen for a broad range of target cells including astrocytes, Schwann cells and fibroblasts |
|        | 100-55B     |                                                     |                                     |                                                                                     | -                                     | -           | -              | -             |                                                                                                                                                                     |
|        | -           |                                                     |                                     |                                                                                     | Recombinant Human Amphiregulin        |             |                |               |                                                                                                                                                                     |
| 4      | Prestwick   | betahistine                                         | 198334                              |    | 5648                                  |             |                |               | Histamine Agonists, Vasodilator Agents                                                                                                                              |
|        | Prestw-543  |                                                     |                                     |                                                                                     | 0                                     | 0           | 0              | 0             |                                                                                                                                                                     |
|        | 54856-23-4  |                                                     |                                     |                                                                                     | Betahistine mesylate                  |             |                |               |                                                                                                                                                                     |
| 5      | Prestwick   | betaxolol                                           | 107952                              |  | 3989                                  |             |                |               | Adrenergic beta-1 Receptor Antagonists, Antihypertensive Agents, Sympatholytics                                                                                     |
|        | Prestw-382  |                                                     |                                     |                                                                                     | 3                                     | 67          | 4              | 667           |                                                                                                                                                                     |
|        | 63659-19-8  |                                                     |                                     |                                                                                     | Betaxolol hydrochloride               |             |                |               |                                                                                                                                                                     |
| 6      | Prestwick   | bisacodyl                                           | 2391                                |  | 3975                                  |             |                |               | Cathartics                                                                                                                                                          |
|        | Prestw-419  |                                                     |                                     |                                                                                     | 4                                     | 158         | 11             | 550           |                                                                                                                                                                     |
|        | 603-50-9    |                                                     |                                     |                                                                                     | Bisacodyl                             |             |                |               |                                                                                                                                                                     |
| 7      | InvivoGen   | C12-iE-DAP                                          | 45480617                            |  | 1000                                  |             |                |               | PGN-like molecule - recognized by the intracellular sensor NOD1, which results in NF-κB activation and the production of inflammatory cytokines                     |
|        | tlrl-c12dap |                                                     |                                     |                                                                                     | -                                     | -           | -              | -             |                                                                                                                                                                     |
|        | -           |                                                     |                                     |                                                                                     | C12-iE-DAP                            |             |                |               |                                                                                                                                                                     |
| 8      | Prestwick   | carbachol                                           | 5831                                |  | 3982                                  |             |                |               | Analgesics, Non-Narcotic, Cardiotonic Agents, Cholinergic Agonists, Miotics                                                                                         |
|        | Prestw-880  |                                                     |                                     |                                                                                     | 41                                    | 178         | 11             | 295           |                                                                                                                                                                     |
|        | 51-83-2     |                                                     |                                     |                                                                                     | Carbachol                             |             |                |               |                                                                                                                                                                     |

Supplementary Table 4. Final selection of 52 stimuli used in the main experiment (to be continued).

| LEGEND | Supplier            | compound name from UniProt, PubChem or other source | compound ID from UniProt or PubChem | compound IMAGE from PubChem, PDB or other source                                    | target concentration we used in ng/ml |             |                |               | Compound Function, Pharmacological Action or general Biological Effect. Sources: UniProt, PubChem, MeSH, other                                                                                                                                                                                               |
|--------|---------------------|-----------------------------------------------------|-------------------------------------|-------------------------------------------------------------------------------------|---------------------------------------|-------------|----------------|---------------|--------------------------------------------------------------------------------------------------------------------------------------------------------------------------------------------------------------------------------------------------------------------------------------------------------------|
|        | Catalog #           |                                                     |                                     |                                                                                     | active IC50s                          | total IC50s | active screens | total screens |                                                                                                                                                                                                                                                                                                              |
|        | CAS #               |                                                     |                                     |                                                                                     | Supplier's name for compound          |             |                |               |                                                                                                                                                                                                                                                                                                              |
| 9      | PeproTech           | CL3L1 (C-C motif chemokine 3-like 1)                | P16619                              | 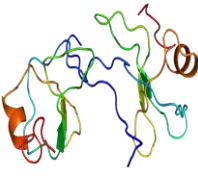   | 200                                   |             |                |               | Chemotactic for lymphocytes and monocytes. Is a ligand for CCR1, CCR3 and CCR5. Is an inhibitor of HIV-1-infection. The processed form LD78-beta(3-70) shows a 20-fold to 30-fold higher chemotactic activity                                                                                                |
|        | 300-56              |                                                     |                                     |                                                                                     | -                                     | -           | -              | -             |                                                                                                                                                                                                                                                                                                              |
|        | -                   |                                                     |                                     |                                                                                     | Recombinant Human LD78β (CCL3L1)      |             |                |               |                                                                                                                                                                                                                                                                                                              |
| 10     | Sigma               | cholesterol                                         | 5997                                |    | 2000                                  |             |                |               | Pharmaceutic aid (emulsifying agent). Cholesterol is used in liposomes to encapsulate and deliver chemotherapeutic drugs to diseased tissues. Cholesterol-C14 is used clinically as an organ imaging agent. Organs visualized by the technique include ovaries, adrenals, and spleen                         |
|        | C3045               |                                                     |                                     |                                                                                     | 0                                     | 16          | 0              | 6             |                                                                                                                                                                                                                                                                                                              |
|        | 57-88-5             |                                                     |                                     |                                                                                     | Cholesterol                           |             |                |               |                                                                                                                                                                                                                                                                                                              |
| 11     | Prestwick           | cisapride                                           | 2769                                |    | 4007                                  |             |                |               | Anti-Ulcer Agents, Gastrointestinal Agents, Serotonin Receptor Agonists                                                                                                                                                                                                                                      |
|        | Prestw-430          |                                                     |                                     |                                                                                     | 55                                    | 155         | 0              | 4             |                                                                                                                                                                                                                                                                                                              |
|        | 81098-60-4          |                                                     |                                     |                                                                                     | Cisapride                             |             |                |               |                                                                                                                                                                                                                                                                                                              |
| 12     | Prestwick           | clenbuterol                                         | 5702273                             |   | 4015                                  |             |                |               | Adrenergic beta-Agonists, Bronchodilator Agents, Sympathomimetics                                                                                                                                                                                                                                            |
|        | Prestw-345          |                                                     |                                     |                                                                                     | 2                                     | 39          | 7              | 457           |                                                                                                                                                                                                                                                                                                              |
|        | 21898-19-1          |                                                     |                                     |                                                                                     | Clenbuterol hydrochloride             |             |                |               |                                                                                                                                                                                                                                                                                                              |
| 13     | Prestwick           | clomipramine                                        | 68539                               |  | 4005                                  |             |                |               | Antidepressive Agents: Tricyclic, Serotonin Uptake Inhibitors                                                                                                                                                                                                                                                |
|        | Prestw-269          |                                                     |                                     |                                                                                     | 10                                    | 49          | 27             | 572           |                                                                                                                                                                                                                                                                                                              |
|        | 17321-77-6          |                                                     |                                     |                                                                                     | Clomipramine hydrochloride            |             |                |               |                                                                                                                                                                                                                                                                                                              |
| 14     | PeproTech           | CNTF (ciliary neurotrophic factor)                  | P26441// P20294                     |  | 200                                   |             |                |               | CNTF is a survival factor for various neuronal cell types. Seems to prevent the degeneration of motor axons after axotomy                                                                                                                                                                                    |
|        | 450-13 // 450-50    |                                                     |                                     |                                                                                     | -                                     | -           | -              | -             |                                                                                                                                                                                                                                                                                                              |
|        | -                   |                                                     |                                     |                                                                                     | Recombinant Human//Rat CNTF           |             |                |               |                                                                                                                                                                                                                                                                                                              |
| 15     | Prestwick           | dexamethasone acetate                               | 236702                              |  | 392                                   |             |                |               | Anti-Inflammatory Agents                                                                                                                                                                                                                                                                                     |
|        | Prestw-130          |                                                     |                                     |                                                                                     | 0                                     | 41          | 3              | 559           |                                                                                                                                                                                                                                                                                                              |
|        | 1177-87-3           |                                                     |                                     |                                                                                     | Dexamethasone acetate                 |             |                |               |                                                                                                                                                                                                                                                                                                              |
| 16     | VWR                 | oxalylglycine                                       | 560326                              |  | 175140                                |             |                |               | Dimethylloxallyl glycine (DMOG) is a cell permeable, competitive inhibitor of HIF-alpha prolyl hydroxylase (HIF-PH) (biomol.de)                                                                                                                                                                              |
|        | CAYM71210-10        |                                                     |                                     |                                                                                     | 0                                     | 0           | 0              | 3             |                                                                                                                                                                                                                                                                                                              |
|        | 89464-63-1          |                                                     |                                     |                                                                                     | DIMETHYLOXALLYL GLYCINE               |             |                |               |                                                                                                                                                                                                                                                                                                              |
| 17     | PeproTech           | EGF (pro-epidermal growth factor)                   | P01133// P07522                     |  | 100                                   |             |                |               | EGF stimulates the growth of various epidermal and epithelial tissues in vivo and in vitro and of some fibroblasts in cell culture. Magnesiotropic hormone that stimulates magnesium reabsorption in the renal distal convoluted tubule via engagement of EGFR and activation of the magnesium channel TRPM6 |
|        | AF-100-15 // 400-25 |                                                     |                                     |                                                                                     | -                                     | -           | -              | -             |                                                                                                                                                                                                                                                                                                              |
|        | -                   |                                                     |                                     |                                                                                     | Recombinant Human//Rat EGF            |             |                |               |                                                                                                                                                                                                                                                                                                              |

| LEGEND | Supplier    | compound name from UniProt, PubChem or other source | compound ID from UniProt or PubChem | compound IMAGE from PubChem, PDB or other source                                    | target concentration we used in ng/ml |             |                |               | Compound Function, Pharmacological Action or general Biological Effect. Sources: UniProt, PubChem, MeSH, other                                                                                                                                                                                                                                                                                                                                                                                        |
|--------|-------------|-----------------------------------------------------|-------------------------------------|-------------------------------------------------------------------------------------|---------------------------------------|-------------|----------------|---------------|-------------------------------------------------------------------------------------------------------------------------------------------------------------------------------------------------------------------------------------------------------------------------------------------------------------------------------------------------------------------------------------------------------------------------------------------------------------------------------------------------------|
|        | Catalog #   |                                                     |                                     |                                                                                     | active IC50s                          | total IC50s | active screens | total screens |                                                                                                                                                                                                                                                                                                                                                                                                                                                                                                       |
|        | CAS #       |                                                     |                                     |                                                                                     | Supplier's name for compound          |             |                |               |                                                                                                                                                                                                                                                                                                                                                                                                                                                                                                       |
| 18     | SantaCruz   | epigallocatechin gallate                            | 65064                               | 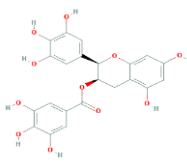   | 45840                                 |             |                |               | Anticarcinogenic Agents, Antimutagenic Agents, Antioxidants, Neuroprotective Agents                                                                                                                                                                                                                                                                                                                                                                                                                   |
|        | sc-200802   |                                                     |                                     |                                                                                     | 61                                    | 100         | 11             | 153           |                                                                                                                                                                                                                                                                                                                                                                                                                                                                                                       |
|        | 989-51-5    |                                                     |                                     |                                                                                     | (-)-Epigallocatechin Gallate          |             |                |               |                                                                                                                                                                                                                                                                                                                                                                                                                                                                                                       |
| 19     | PeptoTech   | FGF8 (fibroblast growth factor 8)                   | P55075                              |    | 100                                   |             |                |               | Plays an important role in the regulation of embryonic development, cell proliferation, cell differentiation and cell migration. Required for normal brain, eye, ear and limb development during embryogenesis. Required for normal development of the gonadotropin-releasing hormone (GnRH) neuronal system                                                                                                                                                                                          |
|        | 100-25      |                                                     |                                     |                                                                                     | -                                     | -           | -              | -             |                                                                                                                                                                                                                                                                                                                                                                                                                                                                                                       |
|        | -           |                                                     |                                     |                                                                                     | Recombinant Human FGF-8               |             |                |               |                                                                                                                                                                                                                                                                                                                                                                                                                                                                                                       |
| 20     | InvivoGen   | FLIC_SALTY (flagellin)                              | P06179                              |    | 1000                                  |             |                |               | Flagellin is the subunit protein which polymerizes to form the filaments of bacterial flagella. and is a proinflammatory molecule recognized by distinct types of pattern recognition receptors (PRRs): the surface localized Toll-like receptor (TLR5) and the cytosolic NOD-like receptors (NLRs), NLRC4 and NAIP5                                                                                                                                                                                  |
|        | ttrl-psftla |                                                     |                                     |                                                                                     | -                                     | -           | -              | -             |                                                                                                                                                                                                                                                                                                                                                                                                                                                                                                       |
|        | -           |                                                     |                                     |                                                                                     | FLA-ST Ultrapure                      |             |                |               |                                                                                                                                                                                                                                                                                                                                                                                                                                                                                                       |
| 21     | Sigma       | formaldehyde                                        | 712                                 |    | 150                                   |             |                |               | Disinfectants, Fixatives                                                                                                                                                                                                                                                                                                                                                                                                                                                                              |
|        | 15512       |                                                     |                                     |                                                                                     | 0                                     | 0           | 0              | 2             |                                                                                                                                                                                                                                                                                                                                                                                                                                                                                                       |
|        | 50-00-0     |                                                     |                                     |                                                                                     | Formaldehyde solution                 |             |                |               |                                                                                                                                                                                                                                                                                                                                                                                                                                                                                                       |
| 22     | SantaCruz   | forskolin                                           | 47936                               |  | 4105                                  |             |                |               | Potent activator of the adenylate cyclase system and the biosynthesis of cyclic AMP                                                                                                                                                                                                                                                                                                                                                                                                                   |
|        | sc-3562     |                                                     |                                     |                                                                                     | 3                                     | 22          | 22             | 322           |                                                                                                                                                                                                                                                                                                                                                                                                                                                                                                       |
|        | 66575-29-9  |                                                     |                                     |                                                                                     | Forskolin                             |             |                |               |                                                                                                                                                                                                                                                                                                                                                                                                                                                                                                       |
| 23     | InvivoGen   | FSL-1                                               | -                                   |  | 1000                                  |             |                |               | Synthetic diacylated lipoprotein - TLR2/TLR6 ligand                                                                                                                                                                                                                                                                                                                                                                                                                                                   |
|        | ttrl-fsl    |                                                     |                                     |                                                                                     | -                                     | -           | -              | -             |                                                                                                                                                                                                                                                                                                                                                                                                                                                                                                       |
|        | -           |                                                     |                                     |                                                                                     | FSL-1                                 |             |                |               |                                                                                                                                                                                                                                                                                                                                                                                                                                                                                                       |
| 24     | PeptoTech   | HBEGF (proheparin-binding EGF-like growth factor)   | Q99075                              |  | 50                                    |             |                |               | Growth factor that mediates its effects via EGFR, ERBB2 and ERBB4. Required for normal cardiac valve formation and normal heart function. Promotes smooth muscle cell proliferation. May be involved in macrophage-mediated cellular proliferation. It is mitogenic for fibroblasts, but not endothelial cells. It is able to bind EGF receptor/EGFR with higher affinity than EGF itself and is a far more potent mitogen for smooth muscle cells than EGF. Also acts as a diphtheria toxin receptor |
|        | 100-47      |                                                     |                                     |                                                                                     | -                                     | -           | -              | -             |                                                                                                                                                                                                                                                                                                                                                                                                                                                                                                       |
|        | -           |                                                     |                                     |                                                                                     | Recombinant Human HB-EGF              |             |                |               |                                                                                                                                                                                                                                                                                                                                                                                                                                                                                                       |
| 25     | Prestwick   | hexestrol                                           | 3606                                |  | 4001                                  |             |                |               | Antineoplastic Agents, Hormonal, Estrogens/Non-Steroidal                                                                                                                                                                                                                                                                                                                                                                                                                                              |
|        | Prestw-699  |                                                     |                                     |                                                                                     | 1                                     | 13          | 1              | 285           |                                                                                                                                                                                                                                                                                                                                                                                                                                                                                                       |
|        | 84-16-2     |                                                     |                                     |                                                                                     | Hexestrol                             |             |                |               |                                                                                                                                                                                                                                                                                                                                                                                                                                                                                                       |

| LEGEND | Supplier           | compound name from UniProt, PubChem or other source | compound ID from UniProt or PubChem | compound IMAGE from PubChem, PDB or other source                                    | target concentration we used in ng/ml |             |                |               | Compound Function, Pharmacological Action or general Biological Effect. Sources: UniProt, PubChem, MeSH, other                                                                                                                                                                                                                                                                                                              |
|--------|--------------------|-----------------------------------------------------|-------------------------------------|-------------------------------------------------------------------------------------|---------------------------------------|-------------|----------------|---------------|-----------------------------------------------------------------------------------------------------------------------------------------------------------------------------------------------------------------------------------------------------------------------------------------------------------------------------------------------------------------------------------------------------------------------------|
|        | Catalog #          |                                                     |                                     |                                                                                     | active IC50s                          | total IC50s | active screens | total screens |                                                                                                                                                                                                                                                                                                                                                                                                                             |
|        | CAS #              |                                                     |                                     |                                                                                     | Supplier's name for compound          |             |                |               |                                                                                                                                                                                                                                                                                                                                                                                                                             |
| 26     | SantaCruz          | glucose                                             | 5793                                | 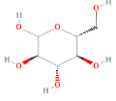   | 9008000                               |             |                |               | Sweetening Agents                                                                                                                                                                                                                                                                                                                                                                                                           |
|        | sc-211203          |                                                     |                                     |                                                                                     | 0                                     | 4           | 0              | 5             |                                                                                                                                                                                                                                                                                                                                                                                                                             |
|        | 50-99-7            |                                                     |                                     |                                                                                     | D(+)-Glucose, Anhydrous               |             |                |               |                                                                                                                                                                                                                                                                                                                                                                                                                             |
| 27     | PeprTech           | IFNG (interferon gamma)                             | P01579// P01581                     |    | 100                                   |             |                |               | Produced by lymphocytes activated by specific antigens or mitogens. IFN-gamma, in addition to having antiviral activity, has important immunoregulatory functions. It is a potent activator of macrophages, it has antiproliferative effects on transformed cells and it can potentiate the antiviral and antitumor effects of the type I interferons                                                                       |
|        | 300-02 // 400-20   |                                                     |                                     |                                                                                     | -                                     | -           | -              | -             |                                                                                                                                                                                                                                                                                                                                                                                                                             |
| 28     | PeprTech           | IGF2 (insulin-like growth factor II)                | P01344                              |    | 100                                   |             |                |               | The insulin-like growth factors possess mitogens-growth-promoting activity, influenced by placental lactogen, IGF-II may play a role in fetal development. Preptin undergoes glucose-mediated co-secretion with insulin, and acts as physiological amplifier of glucose-mediated insulin secretion. Exhibits osteogenic properties by increasing osteoblast mitogenic activity through phosphoactivation of MAPK1 and MAPK3 |
|        | 100-12             |                                                     |                                     |                                                                                     | -                                     | -           | -              | -             |                                                                                                                                                                                                                                                                                                                                                                                                                             |
| 29     | PeprTech           | IL11 (interleukin-11)                               | P20809                              |  | 100                                   |             |                |               | Directly stimulates the proliferation of hematopoietic stem cells and megakaryocyte progenitor cells and induces megakaryocyte maturation resulting in increased platelet production.                                                                                                                                                                                                                                       |
|        | 200-11             |                                                     |                                     |                                                                                     | -                                     | -           | -              | -             |                                                                                                                                                                                                                                                                                                                                                                                                                             |
| 30     | PeprTech           | IL1B (interleukin-1 beta)                           | P01584// Q63264                     |  | 50                                    |             |                |               | Produced by activated macrophages, IL-1 stimulates thymocyte proliferation by inducing IL-2 release, B-cell maturation and proliferation, and fibroblast growth factor activity. IL-1 proteins are involved in the inflammatory response, being identified as endogenous pyrogens, and are reported to stimulate the release of prostaglandin and collagenase from synovial cells                                           |
|        | 200-01B // 400-01B |                                                     |                                     |                                                                                     | -                                     | -           | -              | -             |                                                                                                                                                                                                                                                                                                                                                                                                                             |
| 31     | PeprTech           | IL4 (interleukin-4)                                 | P05112// P20096                     |  | 100                                   |             |                |               | Participates in at least several B-cell activation processes as well as of other cell types. It is a costimulator of DNA-synthesis. It induces the expression of class II MHC molecules on resting B-cells. It enhances both secretion and cell surface expression of IgE and IgG1. It also regulates the expression of the low affinity Fc receptor for IgE (CD23) on both lymphocytes and monocytes                       |
|        | 200-04 // 400-04   |                                                     |                                     |                                                                                     | -                                     | -           | -              | -             |                                                                                                                                                                                                                                                                                                                                                                                                                             |
| 32     | Sigma              | INS (insulin)                                       | P01308                              |  | 1722                                  |             |                |               | Insulin decreases blood glucose concentration. It increases cell permeability to monosaccharides, amino acids and fatty acids. It accelerates glycolysis, the pentose phosphate cycle, and glycogen synthesis in liver                                                                                                                                                                                                      |
|        | 19278              |                                                     |                                     |                                                                                     | -                                     | -           | -              | -             |                                                                                                                                                                                                                                                                                                                                                                                                                             |
|        | 11061-68-0         |                                                     |                                     |                                                                                     | Insulin solution human                |             |                |               |                                                                                                                                                                                                                                                                                                                                                                                                                             |

| LEGEND | Supplier              | compound name from UniProt, PubChem or other source | compound ID from UniProt or PubChem | compound IMAGE from PubChem, PDB or other source                                                                     | target concentration we used in ng/ml |             |                |               | Compound Function, Pharmacological Action or general Biological Effect. Sources: UniProt, PubChem, MeSH, other                                                                                                                                                                                                                                                                                                    |
|--------|-----------------------|-----------------------------------------------------|-------------------------------------|----------------------------------------------------------------------------------------------------------------------|---------------------------------------|-------------|----------------|---------------|-------------------------------------------------------------------------------------------------------------------------------------------------------------------------------------------------------------------------------------------------------------------------------------------------------------------------------------------------------------------------------------------------------------------|
|        | Catalog #             |                                                     |                                     |                                                                                                                      | active IC50s                          | total IC50s | active screens | total screens |                                                                                                                                                                                                                                                                                                                                                                                                                   |
|        | CAS #                 |                                                     |                                     |                                                                                                                      | Supplier's name for compound          |             |                |               |                                                                                                                                                                                                                                                                                                                                                                                                                   |
| 33     | SantaCruz             | pyrilamine                                          | 5284451                             | 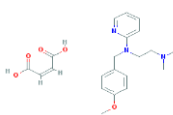                                    | 2854                                  |             |                |               | Anti-Allergic Agents, Histamine H1 Antagonists                                                                                                                                                                                                                                                                                                                                                                    |
|        | sc-203629             |                                                     |                                     |                                                                                                                      | 3                                     | 53          | 3              | 805           |                                                                                                                                                                                                                                                                                                                                                                                                                   |
|        | 59-33-6               |                                                     |                                     |                                                                                                                      | Mepyramine maleate                    |             |                |               |                                                                                                                                                                                                                                                                                                                                                                                                                   |
| 34     | Sigma                 | sodium chloride                                     | 5234                                |                                     | 8766000                               |             |                |               | Sodium Chloride (NaCl) is found in nature, in all body tissue, and is considered an essential nutrient (SantaCruz)                                                                                                                                                                                                                                                                                                |
|        | S5886                 |                                                     |                                     |                                                                                                                      | 0                                     | 0           | 0              | 0             |                                                                                                                                                                                                                                                                                                                                                                                                                   |
|        | 7647-14-5             |                                                     |                                     |                                                                                                                      | Sodium Chloride                       |             |                |               |                                                                                                                                                                                                                                                                                                                                                                                                                   |
| 35     | Prestwick             | nisoxetine                                          | 134453                              |                                     | 3528                                  |             |                |               | Nisoxetine hydrochloride is a selective and potent inhibitor of noradrenaline uptake with little or no affinity for a range of other neurotransmitter receptors. Nisoxetine hydrochloride is an inhibitor of SLC6A2 (SantaCruz)                                                                                                                                                                                   |
|        | Prestw-910            |                                                     |                                     |                                                                                                                      | 4                                     | 18          | 1              | 313           |                                                                                                                                                                                                                                                                                                                                                                                                                   |
|        | 57754-86-6            |                                                     |                                     |                                                                                                                      | Nisoxetine hydrochloride              |             |                |               |                                                                                                                                                                                                                                                                                                                                                                                                                   |
| 36     | Prestwick             | norethindrone                                       | 6230                                |                                     | 3999                                  |             |                |               | Contraceptives/ Oral/ Synthetic                                                                                                                                                                                                                                                                                                                                                                                   |
|        | Prestw-253            |                                                     |                                     |                                                                                                                      | 9                                     | 133         | 1              | 320           |                                                                                                                                                                                                                                                                                                                                                                                                                   |
|        | 68-22-4               |                                                     |                                     |                                                                                                                      | Norethindrone                         |             |                |               |                                                                                                                                                                                                                                                                                                                                                                                                                   |
| 37     | PeproTech             | NTF3 (neurotrophin-3)                               | P20783                              |                                    | 200                                   |             |                |               | Seems to promote the survival of visceral and proprioceptive sensory neurons                                                                                                                                                                                                                                                                                                                                      |
|        | 450-03                |                                                     |                                     |                                                                                                                      | -                                     | -           | -              | -             |                                                                                                                                                                                                                                                                                                                                                                                                                   |
|        | -                     |                                                     |                                     |                                                                                                                      | Recombinant Human NT-3                |             |                |               |                                                                                                                                                                                                                                                                                                                                                                                                                   |
| 38     | InvivoGen             | ODN2006                                             | -                                   | <br>5'-tcgtcgttttgtcgtttgtcgtt-3' | 18259                                 |             |                |               | Class B CpG oligonucleotide - Human TLR9 ligand                                                                                                                                                                                                                                                                                                                                                                   |
|        | tlrl-2006             |                                                     |                                     |                                                                                                                      | -                                     | -           | -              | -             |                                                                                                                                                                                                                                                                                                                                                                                                                   |
|        | -                     |                                                     |                                     |                                                                                                                      | ODN 2006 (ODN 7909)                   |             |                |               |                                                                                                                                                                                                                                                                                                                                                                                                                   |
| 39     | PeproTech R&Dsystem   | PDGFB (platelet-derived growth factor subunit B)    | P01127// Q05028                     |                                   | 50                                    |             |                |               | Growth factor that plays an essential role in the regulation of embryonic development, cell proliferation, cell migration, survival and chemotaxis. Potent mitogen for cells of mesenchymal origin. Required for normal blood vessel, skin, lung, heart, placenta, and kidney glomeruli development. Plays an important role in wound healing. Signaling is modulated by the formation of heterodimers with PDGFA |
|        | 100-14B // 520-BB-050 |                                                     |                                     |                                                                                                                      | -                                     | -           | -              | -             |                                                                                                                                                                                                                                                                                                                                                                                                                   |
|        | -                     |                                                     |                                     |                                                                                                                      | Recombinant Human//Rat PDGF-BB        |             |                |               |                                                                                                                                                                                                                                                                                                                                                                                                                   |
| 40     | Sigma                 | tetradecanoylphorbol acetate                        | 27924                               |                                   | 500                                   |             |                |               | PMA potent activator of protein Kinase C (PKC)                                                                                                                                                                                                                                                                                                                                                                    |
|        | P1585                 |                                                     |                                     |                                                                                                                      | 8                                     | 8           | 2              | 26            |                                                                                                                                                                                                                                                                                                                                                                                                                   |
|        | 16561-29-8            |                                                     |                                     |                                                                                                                      | Phorbol 12-myristate 13-acetate       |             |                |               |                                                                                                                                                                                                                                                                                                                                                                                                                   |

| LEGEND | Supplier   | compound name from UniProt, PubChem or other source | compound ID from UniProt or PubChem | compound IMAGE from PubChem, PDB or other source                                    | target concentration we used in ng/ml  |             |                |               | Compound Function, Pharmacological Action or general Biological Effect. Sources: UniProt, PubChem, MeSH, other                                                                                                                                                                                                                                                                                                                                                                                                                                                                                                                                                                                                                                                                 |
|--------|------------|-----------------------------------------------------|-------------------------------------|-------------------------------------------------------------------------------------|----------------------------------------|-------------|----------------|---------------|--------------------------------------------------------------------------------------------------------------------------------------------------------------------------------------------------------------------------------------------------------------------------------------------------------------------------------------------------------------------------------------------------------------------------------------------------------------------------------------------------------------------------------------------------------------------------------------------------------------------------------------------------------------------------------------------------------------------------------------------------------------------------------|
|        | Catalog #  |                                                     |                                     |                                                                                     | active IC50s                           | total IC50s | active screens | total screens |                                                                                                                                                                                                                                                                                                                                                                                                                                                                                                                                                                                                                                                                                                                                                                                |
|        | CAS #      |                                                     |                                     |                                                                                     | Supplier's name for compound           |             |                |               |                                                                                                                                                                                                                                                                                                                                                                                                                                                                                                                                                                                                                                                                                                                                                                                |
| 41     | InvivoGen  | Poly(I:C)                                           | -                                   | 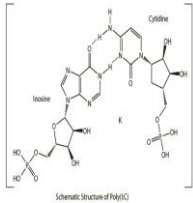   | 10000                                  |             |                |               | Polyinosinic-polycytidylic acid (poly(I:C)) is a synthetic analog of double-stranded RNA (dsRNA), a molecular pattern associated with viral infection. Poly(I:C) is recognized by TLR3 inducing the activation of NF-κB and the production of cytokines                                                                                                                                                                                                                                                                                                                                                                                                                                                                                                                        |
|        | tlrl-pic   |                                                     |                                     |                                                                                     | -                                      | -           | -              | -             |                                                                                                                                                                                                                                                                                                                                                                                                                                                                                                                                                                                                                                                                                                                                                                                |
|        | 31852-29-6 |                                                     |                                     |                                                                                     | Poly(I:C) High Molecular Weight        |             |                |               |                                                                                                                                                                                                                                                                                                                                                                                                                                                                                                                                                                                                                                                                                                                                                                                |
| 42     | PeproTech  | PROK2 (prokineticin-2)                              | Q9HC23                              |    | 800                                    |             |                |               | May function as an output molecule from the suprachiasmatic nucleus (SCN) that transmits behavioral circadian rhythm. May also function locally within the SCN to synchronize output. Potently contracts gastrointestinal (GI) smooth muscle                                                                                                                                                                                                                                                                                                                                                                                                                                                                                                                                   |
|        | 100-46     |                                                     |                                     |                                                                                     | -                                      | -           | -              | -             |                                                                                                                                                                                                                                                                                                                                                                                                                                                                                                                                                                                                                                                                                                                                                                                |
|        | -          |                                                     |                                     |                                                                                     | Recombinant Human Prokineticin-2       |             |                |               |                                                                                                                                                                                                                                                                                                                                                                                                                                                                                                                                                                                                                                                                                                                                                                                |
| 43     | Prestwick  | promethazine                                        | 6014                                |    | 3979                                   |             |                |               | Anti-Allergic Agents, Antipruritics, Histamine H1 Antagonists                                                                                                                                                                                                                                                                                                                                                                                                                                                                                                                                                                                                                                                                                                                  |
|        | Prestw-888 |                                                     |                                     |                                                                                     | 8                                      | 51          | 14             | 553           |                                                                                                                                                                                                                                                                                                                                                                                                                                                                                                                                                                                                                                                                                                                                                                                |
|        | 58-33-3    |                                                     |                                     |                                                                                     | Promethazine hydrochloride             |             |                |               |                                                                                                                                                                                                                                                                                                                                                                                                                                                                                                                                                                                                                                                                                                                                                                                |
| 44     | SantaCruz  | sirolimus                                           | 5284616                             |    | 914                                    |             |                |               | Anti-Bacterial Agents, Antibiotics/ Antineoplastic, Antifungal Agents, Immunosuppressive Agents                                                                                                                                                                                                                                                                                                                                                                                                                                                                                                                                                                                                                                                                                |
|        | sc-3504    |                                                     |                                     |                                                                                     | 181                                    | 491         | 0              | 5             |                                                                                                                                                                                                                                                                                                                                                                                                                                                                                                                                                                                                                                                                                                                                                                                |
|        | 53123-88-9 |                                                     |                                     |                                                                                     | Rapamycin                              |             |                |               |                                                                                                                                                                                                                                                                                                                                                                                                                                                                                                                                                                                                                                                                                                                                                                                |
| 45     | Prestwick  | riluzole hydrochloride                              | 6419992                             |  | 4006                                   |             |                |               | Riluzole is a neuroprotective agent with anticonvulsant, sedative, anxiolytic, anti-ischemic and anesthetic properties. Inhibits glutamate release, enhances glutamate uptake (abcambiotecnologies)                                                                                                                                                                                                                                                                                                                                                                                                                                                                                                                                                                            |
|        | Prestw-167 |                                                     |                                     |                                                                                     | 0                                      | 33          | 4              | 208           |                                                                                                                                                                                                                                                                                                                                                                                                                                                                                                                                                                                                                                                                                                                                                                                |
|        | -          |                                                     |                                     |                                                                                     | Riluzole hydrochloride                 |             |                |               |                                                                                                                                                                                                                                                                                                                                                                                                                                                                                                                                                                                                                                                                                                                                                                                |
| 46     | Prestwick  | serotonin hydrochloride                             | 160436                              |  | 5901                                   |             |                |               | Endogenous 5-HT receptor agonist. Neurotransmitter involved in diverse physiological functions such as mood, appetite, sleep, sex and temperature in addition to modulating cardiovascular function and the gastrointestinal system (abcambiotecnologies)                                                                                                                                                                                                                                                                                                                                                                                                                                                                                                                      |
|        | Prestw-481 |                                                     |                                     |                                                                                     | 2                                      | 16          | 9              | 319           |                                                                                                                                                                                                                                                                                                                                                                                                                                                                                                                                                                                                                                                                                                                                                                                |
|        | 153-98-0   |                                                     |                                     |                                                                                     | Serotonin hydrochloride                |             |                |               |                                                                                                                                                                                                                                                                                                                                                                                                                                                                                                                                                                                                                                                                                                                                                                                |
| 47     | PeproTech  | SHH (sonic hedgehog protein)                        | Q15465                              |  | 200                                    |             |                |               | Binds to the patched (PTC) receptor, which functions in association with smoothened (SMO), to activate the transcription of target genes. In the absence of SHH, PTC represses the constitutive signaling activity of SMO. Also regulates another target, the gli oncogene. Intercellular signal essential for a variety of patterning events during development: signal produced by the notochord that induces ventral cell fate in the neural tube and somites, and the polarizing signal for patterning of the anterior-posterior axis of the developing limb bud. Displays both floor plate- and motor neuron-inducing activity. The threshold concentration of N-product required for motor neuron induction is 5-fold lower than that required for floor plate induction |
|        | 100-45     |                                                     |                                     |                                                                                     | -                                      | -           | -              | -             |                                                                                                                                                                                                                                                                                                                                                                                                                                                                                                                                                                                                                                                                                                                                                                                |
|        | -          |                                                     |                                     |                                                                                     | Recombinant Human Sonic Hedgehog (Shh) |             |                |               |                                                                                                                                                                                                                                                                                                                                                                                                                                                                                                                                                                                                                                                                                                                                                                                |
| 48     | SantaCruz  | taurocholic acid                                    | 6675                                |  | 51572                                  |             |                |               | Cholagogues and Cholera, Detergents                                                                                                                                                                                                                                                                                                                                                                                                                                                                                                                                                                                                                                                                                                                                            |
|        | sc-220189  |                                                     |                                     |                                                                                     | 1                                      | 6           | 0              | 0             |                                                                                                                                                                                                                                                                                                                                                                                                                                                                                                                                                                                                                                                                                                                                                                                |
|        | 81-24-3    |                                                     |                                     |                                                                                     | Taurocholic acid                       |             |                |               |                                                                                                                                                                                                                                                                                                                                                                                                                                                                                                                                                                                                                                                                                                                                                                                |



| LEGEND | Supplier         | compound name from UniProt, PubChem or other source | compound ID from UniProt or PubChem | compound IMAGE from PubChem, PDB or other source                                    | target concentration we used in ng/ml |             |                |               | Compound Function, Pharmacological Action or general Biological Effect. Sources: UniProt, PubChem, MeSH, other                                                                                                                                                                                                                                                                                       |
|--------|------------------|-----------------------------------------------------|-------------------------------------|-------------------------------------------------------------------------------------|---------------------------------------|-------------|----------------|---------------|------------------------------------------------------------------------------------------------------------------------------------------------------------------------------------------------------------------------------------------------------------------------------------------------------------------------------------------------------------------------------------------------------|
|        | Catalog #        |                                                     |                                     |                                                                                     | active IC50s                          | total IC50s | active screens | total screens |                                                                                                                                                                                                                                                                                                                                                                                                      |
|        | CAS #            |                                                     |                                     |                                                                                     | Supplier's name for compound          |             |                |               |                                                                                                                                                                                                                                                                                                                                                                                                      |
|        |                  |                                                     |                                     |                                                                                     |                                       |             |                |               |                                                                                                                                                                                                                                                                                                                                                                                                      |
| 49     | PeproTech        | TGFA (protransforming growth factor alpha)          | P01135                              | 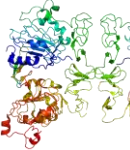   | 200                                   |             |                |               | TGF alpha is a mitogenic polypeptide that is able to bind to the EGF receptor/EGFR and to act synergistically with TGF beta to promote anchorage-independent cell proliferation in soft agar.                                                                                                                                                                                                        |
|        | 100-16A          |                                                     |                                     |                                                                                     | -                                     | -           | -              | -             |                                                                                                                                                                                                                                                                                                                                                                                                      |
|        | -                |                                                     |                                     |                                                                                     | Recombinant Human TGF-α               |             |                |               |                                                                                                                                                                                                                                                                                                                                                                                                      |
| 50     | PeproTech        | TNFA (tumor necrosis factor)                        | P01375// P16599                     |   | 100                                   |             |                |               | Cytokine that binds to TNFRSF1A/TNFR1 and TNFRSF1B/TNFR2. It is mainly secreted by macrophages and can induce cell death of certain tumor cell lines. It is potent pyrogen causing fever by direct action or by stimulation of interleukin-1 secretion and is implicated in the induction of cachexia. Under certain conditions it can stimulate cell proliferation and induce cell differentiation. |
|        | 300-01A// 400-14 |                                                     |                                     |                                                                                     | -                                     | -           | -              | -             |                                                                                                                                                                                                                                                                                                                                                                                                      |
|        | -                |                                                     |                                     |                                                                                     | Recombinant Human//Rat TNF-α          |             |                |               |                                                                                                                                                                                                                                                                                                                                                                                                      |
| 51     | Prestwick        | tolmetin                                            | 23677829                            |  | 3519                                  |             |                |               | Anti-Inflammatory Agents/ Non-Steroidal, Cyclooxygenase Inhibitors                                                                                                                                                                                                                                                                                                                                   |
|        | Prestw-856       |                                                     |                                     |                                                                                     | 0                                     | 0           | 0              | 5             |                                                                                                                                                                                                                                                                                                                                                                                                      |
|        | 64490-92-2       |                                                     |                                     |                                                                                     | Tolmetin sodium salt dihydrate        |             |                |               |                                                                                                                                                                                                                                                                                                                                                                                                      |
| 52     | PeproTech        | WISP3 (WNT1-inducible-signaling pathway protein 3)  | O95389                              |  | 150                                   |             |                |               | Appears to be required for normal postnatal skeletal growth and cartilage homeostasis.                                                                                                                                                                                                                                                                                                               |
|        | 120-20           |                                                     |                                     |                                                                                     | -                                     | -           | -              | -             |                                                                                                                                                                                                                                                                                                                                                                                                      |
|        | -                |                                                     |                                     |                                                                                     | Recombinant Human WISP-3              |             |                |               |                                                                                                                                                                                                                                                                                                                                                                                                      |

Supplementary Table 4. Final selection of 52 stimuli used in the main experiment.
